# Supplementary material for: Deep-learning tool for early identification of non-traumatic intracranial hemorrhage etiology and application in clinical diagnostics based on computed tomography (CT) scans
Source: PeerJ. 2025 Feb 26;13:e18850. doi: 10.7717/peerj.18850 (PMC11871901; doi:10.7717/peerj.18850)
Supplement: Supplemental Information 2 [file peerj-13-18850-s002.xlsx]

## Sheet: Sheet1
141084.20170909.2.1.mhd	1
254258.20171012.2.1.mhd	4
281422.20171023.2.1.mhd	4
312194.20160210.2.1.mhd	1
320261.20171004.2.1.mhd	1
325155.20160501.2.1.mhd	4
346863.20171120.2.1.mhd	4
355220.20151124.2.1.mhd	4
362503.20161012.2.1.mhd	4
380958.20160921.2.1.mhd	1
383938.20170719.2.1.mhd	1
394947.20151204.2.1.mhd	4
398169.20151216.2.1.mhd	4
403589.20160511.2.1.mhd	4
407596.20150829.2.1.mhd	4
422297.20170304.2.1.mhd	4
425445.20160402.3.1.mhd	4
429088.20151114.2.1.mhd	4
434581.20151224.2.1.mhd	3
448596.20161213.2.1.mhd	4
457834.20151102.2.1.mhd	4
460146.20161003.2.1.mhd	4
464395.20180201.2.1.mhd	4
469884.20150531.2.1.mhd	1
470646.20150614.2.1.mhd	1
471676.20150702.2.1.mhd	4
472112.20150627.2.1.mhd	4
472140.20150627.2.1.mhd	1
472211.20150628.2.1.mhd	1
472254.20150627.2.1.mhd	2
472664.20150702.2.1.mhd	1
472689.20150704.2.1.mhd	1
472761.20150703.2.1.mhd	1
472790.20150705.2.1.mhd	1
472797.20150709.2.1.mhd	1
472835.20150713.2.1.mhd	4
473128.20150712.2.1.mhd	1
473143.20150711.2.1.mhd	2
473153.20150708.2.1.mhd	4
473318.20150714.2.1.mhd	1
473336.20150714.2.1.mhd	1
473517.20150715.2.1.mhd	1
473541.20150714.2.1.mhd	1
473727.20150717.3.1.mhd	1
473842.20150722.2.1.mhd	1
473879.20150719.2.1.mhd	1
473880.20150720.2.1.mhd	1
474093.20150726.2.1.mhd	4
474228.20150721.2.1.mhd	4
474229.20150723.2.1.mhd	1
474316.20150725.2.1.mhd	1
474378.20150726.2.1.mhd	1
474447.20150729.2.1.mhd	1
474480.20150726.2.1.mhd	4
474556.20150727.2.1.mhd	4
474595.20150730.2.1.mhd	1
474655.20150729.2.1.mhd	1
474725.20150804.2.1.mhd	1
474741.20150808.2.1.mhd	2
474755.20150728.2.1.mhd	1
474789.20150803.2.1.mhd	1
474838.20150804.2.1.mhd	1
474860.20150801.2.1.mhd	1
474911.20150731.2.1.mhd	1
475085.20150806.2.1.mhd	1
475088.20150805.2.1.mhd	2
475207.20150804.2.1.mhd	1
475399.20150806.2.1.mhd	2
475418.20150805.2.1.mhd	1
475420.20150809.2.1.mhd	1
475437.20150807.2.1.mhd	1
475464.20150808.2.1.mhd	1
475538.20150809.2.1.mhd	1
475572.20150807.2.1.mhd	4
475595.20150806.2.1.mhd	1
475700.20150813.2.1.mhd	1
475703.20150809.2.1.mhd	4
476001.20150816.2.1.mhd	1
476107.20150813.2.1.mhd	1
476120.20150810.2.1.mhd	4
476158.20150814.2.1.mhd	4
476161.20150816.2.1.mhd	4
476210.20150814.2.1.mhd	4
476244.20150822.2.1.mhd	1
476400.20150820.2.1.mhd	1
476427.20150815.2.1.mhd	1
476447.20150822.3.1.mhd	1
476468.20150825.2.1.mhd	3
476531.20150824.2.1.mhd	1
476663.20150823.2.1.mhd	1
476733.20150823.2.1.mhd	4
476777.20150824.2.1.mhd	4
476919.20150827.2.1.mhd	3
476934.20150829.2.1.mhd	4
476998.20150826.2.1.mhd	1
477018.20150831.2.1.mhd	1
477059.20150825.2.1.mhd	1
477105.20150424.2.1.mhd	3
477187.20150903.2.1.mhd	4
477234.20150904.2.1.mhd	1
477246.20150905.2.1.mhd	1
477427.20150901.2.1.mhd	4
477517.20150903.2.1.mhd	4
477531.20160310.2.1.mhd	4
477555.20150903.2.1.mhd	4
477563.20150904.2.1.mhd	1
477747.20150908.2.1.mhd	4
477788.20150909.2.1.mhd	1
477999.20150917.2.1.mhd	1
478192.20150909.2.1.mhd	4
478210.20150828.2.1.mhd	4
478272.20150913.2.1.mhd	1
478444.20150916.2.1.mhd	1
478532.20150910.2.1.mhd	4
478558.20150915.2.1.mhd	1
478664.20150920.2.1.mhd	1
478679.20150918.2.1.mhd	4
478701.20150917.2.1.mhd	1
478718.20150913.2.1.mhd	1
478797.20150919.2.1.mhd	1
478954.20150920.2.1.mhd	1
479096.20150927.2.1.mhd	1
479119.20150922.2.1.mhd	1
479145.20150909.2.1.mhd	4
479190.20151001.2.1.mhd	4
479208.20150923.2.1.mhd	1
479287.20150926.2.1.mhd	1
479314.20150925.2.1.mhd	1
479319.20150928.2.1.mhd	1
479368.20151001.2.1.mhd	1
479441.20151008.2.1.mhd	4
479559.20150929.2.1.mhd	4
479570.20151003.2.1.mhd	1
479572.20151003.2.1.mhd	1
479582.20151005.2.1.mhd	1
479583.20151004.2.1.mhd	1
480048.20151013.2.1.mhd	4
480138.20151005.3.1.mhd	1
480168.20151008.2.1.mhd	1
480393.20151004.2.1.mhd	4
480395.20150916.2.1.mhd	4
480422.20151012.2.1.mhd	1
480538.20151009.2.1.mhd	4
480561.20150930.2.1.mhd	1
480566.20151011.2.1.mhd	2
480567.20151011.2.1.mhd	1
480631.20151010.2.1.mhd	1
480672.20151006.2.1.mhd	1
480742.20151014.2.1.mhd	1
480753.20151011.2.1.mhd	1
480824.20151014.2.1.mhd	1
481656.20151024.2.1.mhd	1
481725.20151025.2.1.mhd	1
481742.20151018.2.1.mhd	4
481746.20151025.2.1.mhd	1
481777.20151027.2.1.mhd	1
481814.20151026.2.1.mhd	4
481824.20151028.2.1.mhd	1
481862.20151027.2.1.mhd	1
481926.20151028.2.1.mhd	4
481991.20151029.6520.2.1.mhd	4
481993.20151028.2.1.mhd	4
481994.20151029.2.1.mhd	1
482033.20151030.2.1.mhd	1
482060.20151027.2.1.mhd	4
482114.20151025.2.1.mhd	1
482145.20151106.2.1.mhd	1
482302.20151028.2.1.mhd	4
482329.20151031.2.1.mhd	1
482338.20151104.2.1.mhd	4
482615.20151012.2.1.mhd	1
482639.20151108.2.1.mhd	1
482705.20151107.2.1.mhd	1
482799.20151108.2.1.mhd	1
482832.20151105.2.1.mhd	1
482870.20151108.2.1.mhd	2
482906.20151104.2.1.mhd	1
482909.20151110.2.1.mhd	4
482914.20151106.2.1.mhd	1
483033.20151115.2.1.mhd	1
483093.20151113.2.1.mhd	2
483286.20151130.2.1.mhd	1
483476.20151115.2.1.mhd	2
483547.20151119.2.1.mhd	1
483613.20151114.2.1.mhd	4
483671.20151031.2.1.mhd	4
483725.20151120.2.1.mhd	1
483884.20151121.2.1.mhd	1
484040.20151125.2.1.mhd	1
484051.20151115.2.1.mhd	4
484059.20151115.2.1.mhd	2
484121.20151122.2.1.mhd	1
484192.20151119.2.1.mhd	4
484206.20151122.2.1.mhd	4
484223.20151120.2.1.mhd	1
484251.20151125.2.1.mhd	4
484440.20151129.2.1.mhd	1
484443.20151126.2.1.mhd	1
484519.20151126.2.1.mhd	1
484572.20151123.2.1.mhd	4
484666.20151127.2.1.mhd	4
484676.20151201.2.1.mhd	4
484709.20151130.2.1.mhd	1
484727.20151127.2.1.mhd	4
484808.20151130.2.1.mhd	4
484855.20151202.2.1.mhd	1
484890.20151203.2.1.mhd	1
485033.20151210.2.1.mhd	2
485057.20151203.2.1.mhd	1
485060.20151204.2.1.mhd	4
485107.20151205.2.1.mhd	4
485264.20151128.2.1.mhd	1
485302.20151204.2.1.mhd	4
485366.20151206.2.1.mhd	1
485427.20151204.2.1.mhd	3
485655.20151208.2.1.mhd	1
485742.20151216.2.1.mhd	4
485847.20151219.2.1.mhd	3
485947.20151220.4.1.mhd	1
485967.20151215.2.1.mhd	1
486047.20151219.2.1.mhd	4
486049.20151220.2.1.mhd	3
486095.20151220.2.1.mhd	4
486096.20151223.2.1.mhd	4
486150.20151222.2.1.mhd	2
486240.20151221.2.1.mhd	1
486266.20151212.2.1.mhd	4
486298.20160116.2.1.mhd	2
486317.20151221.2.1.mhd	1
486426.20151225.2.1.mhd	4
486496.20151222.2.1.mhd	1
486523.20151223.2.1.mhd	2
486661.20151226.2.1.mhd	4
486699.20160102.2.1.mhd	1
486730.20151227.2.1.mhd	1
486770.20161007.2.1.mhd	4
486777.20160102.2.1.mhd	2
486823.20151226.2.1.mhd	4
486936.20151230.2.1.mhd	4
487022.20160110.2.1.mhd	1
487026.20151227.2.1.mhd	4
487043.20150809.2.1.mhd	4
487105.20151224.2.1.mhd	1
487121.20151227.2.1.mhd	4
487189.20160106.2.1.mhd	1
487293.20160110.2.1.mhd	4
487352.20160102.2.1.mhd	1
487436.20160101.2.1.mhd	4
487439.20160107.2.1.mhd	4
487583.20160107.2.1.mhd	1
487743.20160109.2.1.mhd	1
487811.20160107.2.1.mhd	4
487895.20160118.2.1.mhd	1
487925.20160106.2.1.mhd	1
488079.20160111.2.1.mhd	4
488097.20160115.2.1.mhd	1
488132.20160130.2.1.mhd	4
488136.20160201.2.1.mhd	1
488185.20160118.2.1.mhd	4
488375.20151127.2.1.mhd	2
488410.20160117.2.1.mhd	1
488411.20160116.2.1.mhd	4
488498.20160123.2.1.mhd	4
488502.20160105.2.1.mhd	4
488616.20160119.2.1.mhd	1
488629.20160120.2.1.mhd	1
488630.20160122.2.1.mhd	4
488772.20160121.2.1.mhd	1
488900.20160125.2.1.mhd	1
488901.20160108.2.1.mhd	2
488911.20160123.2.1.mhd	1
489055.20160123.2.1.mhd	1
489214.20160126.2.1.mhd	1
489261.20160127.2.1.mhd	1
489327.20160208.2.1.mhd	1
489330.20160205.2.1.mhd	4
489359.20160131.2.1.mhd	1
489391.20160131.2.1.mhd	4
489400.20160205.2.1.mhd	1
489411.20160214.2.1.mhd	4
489435.20160205.2.1.mhd	4
489437.20160206.2.1.mhd	1
489441.20160207.2.1.mhd	1
489442.20160211.2.1.mhd	1
489446.20160208.2.1.mhd	1
489466.20160128.2.1.mhd	2
489498.20160131.2.1.mhd	1
489508.20160131.2.1.mhd	1
489557.20160128.2.1.mhd	1
489610.20160201.2.1.mhd	1
489655.20160202.2.1.mhd	1
489663.20160203.2.1.mhd	1
489666.20160205.2.1.mhd	1
489669.20160205.2.1.mhd	1
489672.20160209.2.1.mhd	1
489703.20160202.2.1.mhd	1
489722.20160209.2.1.mhd	2
489730.20160211.2.1.mhd	4
489733.20160212.2.1.mhd	4
489753.20160210.2.1.mhd	1
489754.20160210.2.1.mhd	4
489854.20160206.2.1.mhd	4
489859.20160209.2.1.mhd	4
489872.20160210.2.1.mhd	4
489885.20160212.2.1.mhd	1
490044.20160218.2.1.mhd	4
490053.20160212.2.1.mhd	1
490085.20160208.2.1.mhd	4
490169.20160217.2.1.mhd	1
490306.20160217.2.1.mhd	1
490308.20160215.2.1.mhd	4
490314.20160216.2.1.mhd	4
490424.20160220.2.1.mhd	4
490449.20160223.2.1.mhd	1
490528.20160221.2.1.mhd	1
490536.20160222.2.1.mhd	1
490554.20160216.2.1.mhd	4
490558.20160216.2.1.mhd	4
490680.20160206.2.1.mhd	2
490707.20160220.2.1.mhd	1
490826.20160229.2.1.mhd	1
490851.20160223.2.1.mhd	1
490920.20160306.2.1.mhd	1
490993.20160225.2.1.mhd	4
492103.20160226.2.1.mhd	4
492179.20160219.2.1.mhd	4
492258.20151228.2.1.mhd	2
492348.20160301.2.1.mhd	1
492420.20160228.2.1.mhd	4
492425.20160228.2.1.mhd	1
492439.20160316.2.1.mhd	4
492590.20160305.2.1.mhd	4
492618.20160304.2.1.mhd	3
492803.20160229.2.1.mhd	4
492813.20150709.2.1.mhd	1
492831.20160307.2.1.mhd	1
492881.20160312.2.1.mhd	4
492966.20160308.2.1.mhd	3
493027.20160309.2.1.mhd	4
493055.20160310.2.1.mhd	2
493068.20160304.2.1.mhd	4
493166.20160307.2.1.mhd	4
493207.20160309.2.1.mhd	1
493250.20160312.2.1.mhd	4
493271.20160312.2.1.mhd	1
493324.20160314.2.1.mhd	1
493342.20160309.2.1.mhd	4
493363.20160313.2.1.mhd	4
493452.20160313.2.1.mhd	1
493456.20160313.2.1.mhd	4
493465.20160219.2.1.mhd	2
493526.20160315.2.1.mhd	1
493527.20160317.2.1.mhd	4
493650.20160308.2.1.mhd	4
493805.20160314.2.1.mhd	4
493870.20160320.2.1.mhd	4
493945.20160319.2.1.mhd	1
494019.20160319.2.1.mhd	4
494023.20160319.2.1.mhd	4
494103.20160321.2.1.mhd	4
494123.20160318.3.1.mhd	3
494126.20160319.2.1.mhd	4
494195.20160329.2.1.mhd	2
494260.20160321.2.1.mhd	1
494265.20160826.2.1.mhd	1
494309.20160319.2.1.mhd	1
494333.20160323.2.1.mhd	1
494365.20160311.2.1.mhd	4
494366.20160322.2.1.mhd	1
494448.20160326.2.1.mhd	1
494533.20160328.2.1.mhd	1
494534.20160325.2.1.mhd	4
494558.20160326.2.1.mhd	1
494628.20160401.2.1.mhd	4
494631.20160405.2.1.mhd	4
494682.20160331.2.1.mhd	1
494689.20160402.2.1.mhd	1
494701.20160326.2.1.mhd	2
494702.20160326.2.1.mhd	4
494810.20160325.2.1.mhd	4
494811.20160326.2.1.mhd	3
494842.20160328.2.1.mhd	4
494975.20160401.2.1.mhd	1
494997.20160328.2.1.mhd	4
495022.20160329.2.1.mhd	1
495122.20160401.2.1.mhd	1
495139.20160402.2.1.mhd	1
495203.20160403.2.1.mhd	1
495236.20160401.2.1.mhd	4
495274.20160328.2.1.mhd	3
495315.20160408.2.1.mhd	1
495320.20160410.2.1.mhd	2
495341.20160413.2.1.mhd	1
495464.20160403.2.1.mhd	1
495499.20160327.2.1.mhd	3
495655.20160405.2.1.mhd	1
495671.20160407.2.1.mhd	4
495680.20160411.2.1.mhd	4
495683.20160411.2.1.mhd	4
495684.20160411.2.1.mhd	4
495802.20160411.2.1.mhd	1
495815.20160404.2.1.mhd	4
495834.20160409.2.1.mhd	4
495926.20160425.2.1.mhd	4
495957.20160411.2.1.mhd	4
496003.20160412.2.1.mhd	4
496038.20160414.2.1.mhd	1
496072.20160413.2.1.mhd	4
496130.20160414.2.1.mhd	1
496217.20160416.2.1.mhd	1
496289.20160418.2.1.mhd	3
496297.20160418.2.1.mhd	4
496324.20160421.2.1.mhd	1
496388.20160419.2.1.mhd	4
496441.20160310.2.1.mhd	1
496641.20160419.2.1.mhd	1
496646.20160421.2.1.mhd	4
496679.20160421.2.1.mhd	1
496850.20160331.2.1.mhd	1
496887.20160422.2.1.mhd	1
496896.20160403.2.1.mhd	4
496899.20160425.2.1.mhd	4
496956.20160422.2.1.mhd	1
497034.20160504.2.1.mhd	1
497041.20160504.2.1.mhd	1
497103.20160424.2.1.mhd	4
497195.20160430.2.1.mhd	1
497222.20160428.2.1.mhd	1
497303.20160425.2.1.mhd	1
497320.20160427.2.1.mhd	1
497359.20160427.2.1.mhd	1
497385.20160503.2.1.mhd	4
497396.20160507.2.1.mhd	2
497473.20160430.2.1.mhd	4
497616.20160506.2.1.mhd	1
497645.20160509.2.1.mhd	4
497810.20160511.2.1.mhd	2
497840.20160504.2.1.mhd	1
497935.20160511.2.1.mhd	1
497944.20160509.2.1.mhd	4
498093.20160508.2.1.mhd	1
498311.20160510.2.1.mhd	1
498358.20160513.2.1.mhd	1
498397.20160515.2.1.mhd	1
498570.20160515.2.1.mhd	2
498644.20160518.2.1.mhd	1
498703.20160515.2.1.mhd	1
498707.20160514.2.1.mhd	4
498733.20160514.2.1.mhd	1
498760.20160510.2.1.mhd	3
498885.20160528.2.1.mhd	1
498900.20160604.2.1.mhd	4
498939.20160518.2.1.mhd	4
498954.20160512.2.1.mhd	4
498986.20160519.2.1.mhd	1
499045.20160531.2.1.mhd	4
499047.20160520.2.1.mhd	4
499075.20160520.2.1.mhd	4
499090.20160510.2.1.mhd	1
499303.20160522.2.1.mhd	1
499359.20160525.2.1.mhd	2
499396.20160520.2.1.mhd	4
499661.20160525.2.1.mhd	1
499851.20160527.2.1.mhd	2
500105.20160530.2.1.mhd	4
500156.20160528.2.1.mhd	1
500194.20160605.2.1.mhd	1
500279.20160524.2.1.mhd	1
500381.20160607.2.1.mhd	1
500405.20160603.2.1.mhd	1
500456.20160605.2.1.mhd	1
500503.20160604.2.1.mhd	4
500571.20160513.2.1.mhd	1
500607.20160609.2.1.mhd	4
500609.20160531.2.1.mhd	4
500627.20160613.2.1.mhd	1
500675.20160606.2.1.mhd	1
500745.20160612.2.1.mhd	1
500814.20160606.2.1.mhd	1
500851.20160610.2.1.mhd	1
500895.20160613.2.1.mhd	1
500921.20160612.2.1.mhd	1
500941.20160612.2.1.mhd	1
500957.20160610.2.1.mhd	1
500980.20160601.2.1.mhd	1
501235.20160615.2.1.mhd	1
501249.20160615.2.1.mhd	1
501390.20160614.2.1.mhd	1
501391.20160615.2.1.mhd	1
501432.20160619.2.1.mhd	1
501438.20160606.2.1.mhd	4
501572.20160616.2.1.mhd	1
501607.20160618.2.1.mhd	1
501638.20180209.2.1.mhd	1
501660.20160616.2.1.mhd	4
501687.20160623.2.1.mhd	1
501746.20160622.2.1.mhd	1
501834.20160623.2.1.mhd	1
501993.20160624.2.1.mhd	1
502001.20160624.2.1.mhd	4
502122.20160624.2.1.mhd	1
502248.20160704.2.1.mhd	2
502391.20160626.2.1.mhd	4
502440.20160628.2.1.mhd	1
502655.20160630.2.1.mhd	1
502666.20160702.2.1.mhd	2
502725.20160627.2.1.mhd	4
502728.20160701.2.1.mhd	4
502729.20160702.2.1.mhd	4
502805.20160701.2.1.mhd	4
502856.20160702.2.1.mhd	4
502861.20160706.2.1.mhd	1
502988.20160705.2.1.mhd	1
503024.20160702.2.1.mhd	4
503034.20160707.2.1.mhd	4
503101.20160705.2.1.mhd	1
503171.20160712.2.1.mhd	2
503279.20160709.2.1.mhd	4
503288.20160710.2.1.mhd	1
503305.20160706.2.1.mhd	1
503313.20160708.2.1.mhd	1
503587.20160713.2.1.mhd	1
503746.20160714.2.1.mhd	1
503805.20160708.2.1.mhd	4
503886.20160714.2.1.mhd	4
503888.20160715.2.1.mhd	4
503942.20160718.2.1.mhd	1
503981.20160716.2.1.mhd	4
504024.20160716.2.1.mhd	4
504073.20160717.2.1.mhd	4
504143.20160721.2.1.mhd	4
504316.20160718.2.1.mhd	4
504344.20160719.2.1.mhd	1
504351.20160719.2.1.mhd	4
504417.20161203.2.1.mhd	1
504553.20160718.2.1.mhd	4
504563.20160722.2.1.mhd	4
504571.20160721.2.1.mhd	1
504592.20160725.2.1.mhd	2
504653.20160723.2.1.mhd	3
504714.20160727.2.1.mhd	4
504749.20160731.2.1.mhd	1
504774.20160726.2.1.mhd	1
504819.20160803.2.1.mhd	4
504853.20160726.2.1.mhd	4
505133.20160728.2.1.mhd	1
505288.20160729.2.1.mhd	4
505323.20160801.2.1.mhd	4
505344.20160801.2.1.mhd	4
505362.20160730.2.1.mhd	4
505387.20160807.2.1.mhd	4
505440.20160801.2.1.mhd	4
505490.20160806.2.1.mhd	1
505519.20160803.2.1.mhd	1
505543.20160730.2.1.mhd	4
505565.20160801.2.1.mhd	1
505789.20160808.2.1.mhd	4
505797.20160807.2.1.mhd	4
505944.20160810.2.1.mhd	1
505992.20160815.2.1.mhd	1
506021.20160810.2.1.mhd	4
506044.20160817.2.1.mhd	4
506155.20160806.2.1.mhd	1
506221.20160810.2.1.mhd	1
506291.20160811.2.1.mhd	4
506305.20160813.2.1.mhd	1
506364.20160812.2.1.mhd	4
506560.20160817.2.1.mhd	2
506682.20160817.2.1.mhd	1
506747.20160821.2.1.mhd	1
506798.20160228.2.1.mhd	1
506873.20160821.2.1.mhd	1
506936.20160824.2.1.mhd	1
506997.20160823.2.1.mhd	2
507013.20160820.2.1.mhd	4
507014.20160820.2.1.mhd	4
507063.20160820.2.1.mhd	1
507104.20160820.2.1.mhd	4
507164.20160818.2.1.mhd	3
507215.20160823.2.1.mhd	1
507281.20160820.2.1.mhd	4
507406.20160826.2.1.mhd	1
507407.20160825.2.1.mhd	1
507412.20160828.2.1.mhd	4
507420.20160829.2.1.mhd	2
507491.20160827.2.1.mhd	1
507620.20160819.2.1.mhd	4
507658.20160830.2.1.mhd	1
507670.20160828.2.1.mhd	4
507694.20160830.2.1.mhd	1
507741.20160830.2.1.mhd	1
507784.20160828.2.1.mhd	4
507896.20160902.2.1.mhd	1
507898.20160902.2.1.mhd	1
507961.20160831.2.1.mhd	1
508077.20160919.3.1.mhd	1
508337.20160919.2.1.mhd	1
508338.20160921.2.1.mhd	1
508385.20160918.2.1.mhd	1
508426.20160928.2.1.mhd	1
508438.20161002.2.1.mhd	1
508439.20160928.2.1.mhd	1
508482.20160919.2.1.mhd	4
508576.20160612.2.1.mhd	3
508603.20160920.2.1.mhd	4
508661.20160921.2.1.mhd	1
508727.20160922.2.1.mhd	1
508763.20160920.2.1.mhd	1
508769.20160921.2.1.mhd	1
508771.20160922.2.1.mhd	2
508908.20160923.2.1.mhd	4
508915.20160926.2.1.mhd	1
508943.20160929.2.1.mhd	1
509070.20160902.2.1.mhd	1
509144.20160914.2.1.mhd	1
509161.20160906.2.1.mhd	4
509178.20160907.2.1.mhd	1
509310.20160904.2.1.mhd	1
509313.20160902.2.1.mhd	4
509368.20160916.2.1.mhd	1
509376.20160925.2.1.mhd	4
509537.20160907.2.1.mhd	4
509582.20160910.2.1.mhd	4
509605.20160907.2.1.mhd	1
509691.20160915.2.1.mhd	1
509692.20160912.2.1.mhd	4
509702.20160908.2.1.mhd	1
509720.20160911.2.1.mhd	2
509750.20160916.2.1.mhd	4
509791.20160914.2.1.mhd	4
509805.20160910.2.1.mhd	1
509820.20160910.2.1.mhd	4
509873.20160912.2.1.mhd	4
509874.20160912.2.1.mhd	4
509886.20160827.2.1.mhd	1
509887.20160917.2.1.mhd	4
509942.20160927.2.1.mhd	1
510042.20161005.2.1.mhd	4
510096.20161001.2.1.mhd	4
510156.20160929.2.1.mhd	4
510219.20161003.2.1.mhd	1
510310.20161006.2.1.mhd	1
510319.20161001.2.1.mhd	4
510362.20160912.2.1.mhd	1
510378.20160926.2.1.mhd	2
510556.20161006.2.1.mhd	2
510574.20161008.2.1.mhd	3
510579.20161013.2.1.mhd	1
510588.20161009.2.1.mhd	4
510614.20161007.2.1.mhd	1
510620.20161009.2.1.mhd	1
510646.20160920.2.1.mhd	2
510766.20161010.2.1.mhd	1
510773.20161008.2.1.mhd	1
510811.20161006.2.1.mhd	4
510919.20161011.2.1.mhd	3
510927.20161015.2.1.mhd	1
510974.20161011.2.1.mhd	4
510985.20161008.2.1.mhd	1
511028.20161016.2.1.mhd	2
511132.20161011.2.1.mhd	3
511198.20161015.2.1.mhd	2
511219.20161014.2.1.mhd	4
511277.20161017.2.1.mhd	1
511325.20161017.2.1.mhd	1
511424.20161022.2.1.mhd	1
511434.20161023.2.1.mhd	4
511490.20161019.2.1.mhd	3
511536.20161019.2.1.mhd	1
511557.20161018.2.1.mhd	2
511683.20161022.2.1.mhd	4
511889.20161020.2.1.mhd	1
511895.20161021.2.1.mhd	1
511896.20161021.2.1.mhd	1
511918.20161020.2.1.mhd	1
511999.20161028.2.1.mhd	4
512037.20161025.2.1.mhd	1
512044.20161027.2.1.mhd	1
512090.20161028.2.1.mhd	4
512173.20161028.2.1.mhd	1
512175.20161104.2.1.mhd	4
512181.20161025.2.1.mhd	1
512223.20161030.2.1.mhd	1
512251.20161025.2.1.mhd	4
512401.20161028.2.1.mhd	4
512509.20161027.2.1.mhd	4
512526.20161103.2.1.mhd	4
512534.20161102.2.1.mhd	1
512715.20161031.2.1.mhd	4
512745.20161030.2.1.mhd	2
512790.20161124.2.1.mhd	4
512853.20161102.2.1.mhd	1
512894.20161105.2.1.mhd	4
512941.20161109.2.1.mhd	1
512955.20161102.2.1.mhd	4
513003.20161102.2.1.mhd	1
513209.20161106.2.1.mhd	1
513231.20161107.2.1.mhd	1
513235.20161028.2.1.mhd	4
513276.20161107.2.1.mhd	1
513285.20161106.2.1.mhd	1
513292.20161108.2.1.mhd	4
513358.20161108.2.1.mhd	4
513370.20161109.2.1.mhd	4
513482.20161109.2.1.mhd	1
513489.20161110.2.1.mhd	1
513682.20161112.2.1.mhd	1
513754.20161109.2.1.mhd	2
513819.20161108.2.1.mhd	4
513951.20161115.2.1.mhd	4
514013.20161112.2.1.mhd	4
514022.20161116.2.1.mhd	4
514026.20161108.2.1.mhd	4
514077.20161117.2.1.mhd	1
514279.20161122.2.1.mhd	1
514386.20161119.2.1.mhd	1
514493.20161121.2.1.mhd	4
514495.20161121.2.1.mhd	4
514563.20161121.2.1.mhd	4
514596.20161123.3.1.mhd	1
514600.20161117.2.1.mhd	4
514609.20161122.2.1.mhd	1
514672.20161127.2.1.mhd	1
514786.20161127.2.1.mhd	4
514884.20161127.2.1.mhd	3
514887.20161123.2.1.mhd	4
514952.20161125.2.1.mhd	4
514973.20161126.2.1.mhd	4
514992.20161127.2.1.mhd	1
515022.20161127.2.1.mhd	4
515106.20161126.2.1.mhd	1
515165.20161207.2.1.mhd	4
515186.20161209.2.1.mhd	1
515243.20161204.2.1.mhd	1
515301.20161129.2.1.mhd	1
515348.20161125.2.1.mhd	4
515457.20161130.2.1.mhd	1
515577.20161204.2.1.mhd	4
515658.20161205.2.1.mhd	1
515690.20161201.2.1.mhd	1
515761.20161206.2.1.mhd	4
515909.20161207.2.1.mhd	1
515935.20161208.2.1.mhd	1
515963.20170222.2.1.mhd	1
515984.20161210.2.1.mhd	4
516005.20161209.2.1.mhd	1
516116.20161210.2.1.mhd	4
516126.20161211.2.1.mhd	1
516144.20161212.2.1.mhd	1
516248.20161210.2.1.mhd	4
516252.20161213.2.1.mhd	1
516323.20161214.2.1.mhd	1
516335.20161214.2.1.mhd	1
516337.20161214.2.1.mhd	1
516406.20161212.2.1.mhd	4
516464.20161214.2.1.mhd	4
516486.20161215.2.1.mhd	4
516524.20161216.2.1.mhd	1
516569.20161216.2.1.mhd	1
516593.20161217.2.1.mhd	4
516596.20161217.2.1.mhd	1
516732.20161220.2.1.mhd	4
516812.20161219.2.1.mhd	4
516823.20161218.2.1.mhd	4
516846.20161216.2.1.mhd	4
516881.20161220.2.1.mhd	1
516983.20161221.2.1.mhd	1
517043.20161221.2.1.mhd	1
517045.20161221.2.1.mhd	1
517047.20161219.2.1.mhd	2
517056.20161215.2.1.mhd	3
517163.20161219.3.1.mhd	4
517341.20170102.2.1.mhd	4
517347.20161225.2.1.mhd	1
517360.20161216.2.1.mhd	4
517368.20161223.2.1.mhd	1
517452.20161226.2.1.mhd	1
517462.20161226.2.1.mhd	1
517590.20161228.2.1.mhd	2
517591.20161225.2.1.mhd	1
517690.20161215.2.1.mhd	3
517717.20161229.2.1.mhd	1
517783.20161230.2.1.mhd	4
517814.20161231.2.1.mhd	1
517822.20161231.2.1.mhd	1
517850.20170101.2.1.mhd	1
517856.20170102.2.1.mhd	4
517857.20170101.2.1.mhd	1
518137.20170103.2.1.mhd	4
518449.20170106.2.1.mhd	1
518548.20170108.2.1.mhd	4
518684.20170109.2.1.mhd	4
518817.20170110.2.1.mhd	4
518905.20170113.2.1.mhd	4
518979.20170112.2.1.mhd	1
519054.20170113.2.1.mhd	1
519063.20170115.2.1.mhd	1
519171.20170107.2.1.mhd	4
519265.20170114.2.1.mhd	1
519270.20170112.2.1.mhd	1
519395.20170115.2.1.mhd	4
519419.20170112.2.1.mhd	4
519427.20170118.2.1.mhd	4
519505.20170119.2.1.mhd	4
519517.20170120.2.1.mhd	4
519556.20170119.2.1.mhd	1
519599.20170119.2.1.mhd	1
519605.20170119.3.1.mhd	1
519654.20170122.2.1.mhd	1
519677.20170119.2.1.mhd	1
519719.20170122.2.1.mhd	1
519803.20170120.2.1.mhd	4
519812.20170122.2.1.mhd	1
519848.20170124.2.1.mhd	4
519868.20170121.2.1.mhd	4
519880.20170123.2.1.mhd	4
519914.20170121.2.1.mhd	4
519915.20170124.2.1.mhd	4
520611.20170125.2.1.mhd	1
520617.20170126.2.1.mhd	4
520619.20170126.2.1.mhd	1
520643.20170127.2.1.mhd	1
520644.20170127.2.1.mhd	1
520672.20170128.2.1.mhd	1
520673.20170120.2.1.mhd	4
520694.20170127.2.1.mhd	4
520697.20170206.2.1.mhd	1
520725.20170129.2.1.mhd	4
520747.20170129.2.1.mhd	4
520844.20170201.2.1.mhd	1
520974.20170202.2.1.mhd	4
521005.20170202.2.1.mhd	4
521162.20170205.2.1.mhd	4
521170.20170128.2.1.mhd	4
521356.20160828.2.1.mhd	3
521364.20170205.2.1.mhd	1
521367.20170203.2.1.mhd	4
521424.20170129.2.1.mhd	2
521431.20170205.2.1.mhd	1
521517.20170131.2.1.mhd	4
521529.20170204.2.1.mhd	4
521542.20170205.2.1.mhd	4
521652.20170201.2.1.mhd	4
521655.20170207.2.1.mhd	4
521855.20170209.2.1.mhd	4
521856.20170209.2.1.mhd	1
521878.20170203.2.1.mhd	1
522058.20170814.2.1.mhd	4
522060.20170211.2.1.mhd	4
522063.20170210.2.1.mhd	4
522122.20170213.2.1.mhd	4
522214.20170213.2.1.mhd	1
522295.20170214.2.1.mhd	1
522306.20170213.2.1.mhd	4
522417.20170215.2.1.mhd	2
522480.20170216.2.1.mhd	1
522524.20170212.2.1.mhd	4
522534.20170217.2.1.mhd	1
522584.20170218.2.1.mhd	1
522708.20170216.2.1.mhd	1
522864.20170216.2.1.mhd	4
522972.20170218.2.1.mhd	4
522975.20170206.2.1.mhd	2
523074.20170221.2.1.mhd	1
523098.20170223.2.1.mhd	4
523142.20170220.2.1.mhd	1
523152.20170214.2.1.mhd	1
523193.20170223.2.1.mhd	1
523200.20170223.2.1.mhd	1
523263.20170225.2.1.mhd	1
523264.20170223.2.1.mhd	1
523418.20170118.2.1.mhd	1
523421.20170226.2.1.mhd	1
523509.20170228.3.1.mhd	1
523518.20170226.2.1.mhd	1
523544.20170225.2.1.mhd	4
523617.20170228.2.1.mhd	4
523648.20170227.2.1.mhd	1
523687.20170225.2.1.mhd	1
523768.20170228.2.1.mhd	1
523941.20170303.2.1.mhd	1
524051.20170306.2.1.mhd	4
524148.20170306.2.1.mhd	1
524200.20170305.2.1.mhd	4
524218.20170220.2.1.mhd	4
524235.20170306.2.1.mhd	1
524373.20170322.2.1.mhd	1
524467.20170307.2.1.mhd	4
524609.20170306.2.1.mhd	1
524671.20170310.2.1.mhd	1
524699.20171109.2.1.mhd	4
524705.20170312.2.1.mhd	2
524787.20170310.2.1.mhd	1
524806.20170310.2.1.mhd	4
524881.20170311.2.1.mhd	1
524934.20170313.2.1.mhd	1
525135.20170315.2.1.mhd	4
525140.20170315.2.1.mhd	4
525273.20170310.2.1.mhd	2
525366.20170317.2.1.mhd	1
525387.20170318.2.1.mhd	1
525472.20170318.2.1.mhd	1
525482.20170317.2.1.mhd	4
525582.20170321.2.1.mhd	4
525593.20170321.2.1.mhd	4
525603.20170320.2.1.mhd	4
525718.20170321.2.1.mhd	1
525929.20170323.2.1.mhd	3
525933.20170323.2.1.mhd	1
525935.20170322.2.1.mhd	1
525958.20170327.2.1.mhd	1
526003.20170324.4.1.mhd	1
526008.20170325.2.1.mhd	1
526017.20170324.2.1.mhd	1
526097.20170326.2.1.mhd	4
526285.20170326.2.1.mhd	1
526293.20170326.2.1.mhd	4
526526.20170330.2.1.mhd	1
526583.20170330.2.1.mhd	1
526649.20170330.2.1.mhd	4
526781.20170331.2.1.mhd	1
526806.20170401.2.1.mhd	1
526822.20170402.2.1.mhd	1
526823.20170401.2.1.mhd	1
526846.20170402.2.1.mhd	1
526922.20170404.2.1.mhd	1
527020.20170405.2.1.mhd	1
527058.20170406.2.1.mhd	1
527083.20170405.2.1.mhd	1
527098.20170405.2.1.mhd	4
527108.20170404.2.1.mhd	4
527243.20170402.2.1.mhd	1
527341.20170407.2.1.mhd	1
527362.20170407.2.1.mhd	1
527483.20170409.2.1.mhd	1
527488.20170409.2.1.mhd	1
527778.20170410.2.1.mhd	4
527798.20170411.2.1.mhd	1
527890.20170413.2.1.mhd	1
527920.20170413.2.1.mhd	4
527975.20170420.2.1.mhd	2
527984.20170413.2.1.mhd	4
528043.20170414.3.1.mhd	1
528130.20170414.2.1.mhd	1
528153.20170415.2.1.mhd	1
528244.20170415.2.1.mhd	1
528316.20170424.2.1.mhd	4
528354.20170416.2.1.mhd	1
528381.20170416.2.1.mhd	4
528495.20170416.2.1.mhd	4
528496.20170418.2.1.mhd	1
528642.20170419.2.1.mhd	1
528776.20170421.2.1.mhd	2
528830.20170421.2.1.mhd	4
528903.20170425.2.1.mhd	1
528989.20170426.2.1.mhd	1
529117.20170425.2.1.mhd	1
529141.20170421.2.1.mhd	2
529142.20170423.2.1.mhd	3
529276.20170426.2.1.mhd	1
529297.20170428.2.1.mhd	2
529455.20170424.2.1.mhd	4
529581.20170428.2.1.mhd	1
529646.20170429.2.1.mhd	1
529712.20170430.2.1.mhd	1
529818.20170426.2.1.mhd	2
529841.20170430.2.1.mhd	1
530053.20170508.2.1.mhd	4
530095.20170503.2.1.mhd	1
530186.20170503.2.1.mhd	1
530443.20170503.2.1.mhd	2
530667.20170508.2.1.mhd	1
530745.20170507.2.1.mhd	4
530776.20170508.2.1.mhd	4
530814.20170509.2.1.mhd	1
530867.20170509.2.1.mhd	1
530872.20170503.3.1.mhd	4
530884.20170510.2.1.mhd	4
531018.20170511.2.1.mhd	4
531130.20170511.2.1.mhd	1
531191.20170512.2.1.mhd	1
531294.20170505.2.1.mhd	4
531312.20170515.2.1.mhd	1
531441.20170515.2.1.mhd	1
531582.20170514.2.1.mhd	4
531595.20170516.2.1.mhd	4
531906.20170520.2.1.mhd	1
531922.20170520.2.1.mhd	1
532003.20170519.2.1.mhd	4
532013.20170521.2.1.mhd	1
532089.20170523.2.1.mhd	1
533139.20170523.2.1.mhd	4
533257.20170525.2.1.mhd	4
533262.20170525.2.1.mhd	3
533271.20170525.2.1.mhd	1
533429.20170527.2.1.mhd	1
533525.20170527.2.1.mhd	1
533538.20170529.2.1.mhd	1
533716.20170521.2.1.mhd	2
533995.20170603.2.1.mhd	1
533998.20170602.2.1.mhd	1
534014.20170602.2.1.mhd	1
534092.20170604.2.1.mhd	1
534104.20170529.2.1.mhd	4
534130.20170605.2.1.mhd	1
534196.20170603.2.1.mhd	1
534389.20170607.2.1.mhd	1
534480.20170608.2.1.mhd	1
534503.20170607.2.1.mhd	4
534546.20170607.2.1.mhd	3
534685.20170610.2.1.mhd	4
534693.20170610.2.1.mhd	1
534805.20170510.3.1.mhd	2
534898.20170613.2.1.mhd	4
534992.20170611.2.1.mhd	1
535071.20170607.2.1.mhd	4
535116.20170627.2.1.mhd	2
535333.20170618.2.1.mhd	1
535426.20170619.2.1.mhd	1
535427.20170617.3.1.mhd	4
535555.20170614.2.1.mhd	4
535565.20170617.2.1.mhd	4
535644.20170324.2.1.mhd	2
535656.20170621.2.1.mhd	1
535724.20170621.2.1.mhd	4
535779.20170622.2.1.mhd	1
535936.20170623.2.1.mhd	1
535987.20170625.2.1.mhd	1
535989.20170624.8390.2.1.mhd	1
535993.20170625.2.1.mhd	4
536056.20170625.2.1.mhd	1
536058.20170625.2.1.mhd	1
536069.20170624.2.1.mhd	1
536081.20170623.2.1.mhd	4
536140.20170626.2.1.mhd	4
536206.20170626.2.1.mhd	1
536551.20170630.2.1.mhd	1
536621.20170701.2.1.mhd	1
536627.20170702.2.1.mhd	1
536629.20170702.2.1.mhd	1
536701.20170702.2.1.mhd	1
536733.20170701.2.1.mhd	1
536796.20170703.2.1.mhd	1
536860.20170627.2.1.mhd	4
536968.20170627.2.1.mhd	4
537087.20170706.2.1.mhd	1
537176.20170707.2.1.mhd	1
537177.20170707.2.1.mhd	1
537335.20170708.3.21.mhd	1
537375.20170705.2.1.mhd	3
537628.20170708.2.1.mhd	4
537752.20170706.2.1.mhd	4
538009.20170717.2.1.mhd	1
538025.20170716.2.1.mhd	4
538146.20170717.2.1.mhd	1
538292.20170705.2.1.mhd	4
538322.20170705.2.1.mhd	3
538452.20170719.2.1.mhd	1
538479.20170722.2.1.mhd	4
538503.20170721.2.1.mhd	1
538508.20170721.2.1.mhd	1
538522.20170720.2.1.mhd	1
538583.20170721.2.1.mhd	1
538606.20170723.2.1.mhd	1
538722.20170724.2.1.mhd	1
538723.20170724.2.1.mhd	1
538810.20170725.2.1.mhd	1
538893.20170723.2.1.mhd	4
538954.20170726.2.1.mhd	1
538970.20170727.2.1.mhd	1
539060.20170727.2.1.mhd	1
539096.20170727.2.1.mhd	4
539244.20170728.2.1.mhd	4
539295.20170801.2.1.mhd	1
539295.20170802.2.1.mhd	1
539323.20170731.2.1.mhd	1
539431.20170731.2.1.mhd	1
539488.20170729.2.1.mhd	2
539574.20170801.2.1.mhd	1
539596.20170801.3.1.mhd	4
539700.20170802.2.1.mhd	4
539836.20170808.2.1.mhd	2
539840.20170803.2.1.mhd	4
539901.20170805.2.1.mhd	1
540102.20170807.2.1.mhd	4
540112.20170807.2.1.mhd	1
540131.20170808.2.1.mhd	1
540403.20170808.2.1.mhd	1
540403.20170813.2.1.mhd	1
540439.20170811.2.1.mhd	1
540449.20170810.2.1.mhd	1
540511.20170812.2.1.mhd	1
540566.20170810.3.1.mhd	1
540584.20170813.2.1.mhd	1
540596.20170815.2.1.mhd	4
540702.20170814.2.1.mhd	1
540855.20170818.2.1.mhd	4
540857.20170816.2.1.mhd	1
540858.20170815.2.1.mhd	4
541075.20170817.2.1.mhd	1
541148.20170819.2.1.mhd	1
541168.20170820.2.1.mhd	1
541338.20170821.2.1.mhd	1
541340.20170821.2.1.mhd	3
541360.20170819.2.1.mhd	4
541423.20170822.2.1.mhd	1
541579.20170824.2.1.mhd	4
541681.20170824.2.1.mhd	1
541682.20170824.2.1.mhd	1
541689.20170823.2.1.mhd	4
541707.20170824.3.1.mhd	1
541752.20170825.2.1.mhd	1
541778.20170827.2.1.mhd	1
541847.20170827.2.1.mhd	4
541884.20170823.2.1.mhd	2
542194.20170901.2.1.mhd	4
542373.20170902.2.1.mhd	1
542382.20170903.2.1.mhd	4
542384.20170902.2.1.mhd	4
542391.20170903.2.1.mhd	1
542392.20170903.3.1.mhd	1
542498.20170902.2.1.mhd	4
542499.20170901.2.1.mhd	4
542504.20170903.2.1.mhd	4
542512.20170902.2.1.mhd	4
542541.20170821.2.1.mhd	4
542679.20170906.2.1.mhd	4
542756.20170905.2.1.mhd	1
542837.20170905.2.1.mhd	1
542955.20170903.2.1.mhd	4
542968.20170908.2.1.mhd	1
543249.20170911.2.1.mhd	4
543361.20170912.2.1.mhd	4
543369.20170911.2.1.mhd	4
543481.20170914.2.1.mhd	1
543502.20170912.2.1.mhd	4
543509.20170913.2.1.mhd	4
543552.20170912.2.1.mhd	1
543612.20170914.2.1.mhd	1
543614.20170914.2.1.mhd	1
543624.20170915.2.1.mhd	1
543677.20170915.2.1.mhd	1
543703.20170916.2.1.mhd	1
543707.20170918.2.1.mhd	1
543720.20170916.2.1.mhd	1
543721.20170916.2.1.mhd	1
543736.20170918.2.1.mhd	4
543869.20170918.2.1.mhd	4
543880.20170916.2.1.mhd	1
543923.20170916.2.1.mhd	1
543938.20170918.2.1.mhd	4
544104.20170920.2.1.mhd	1
544157.20170919.2.1.mhd	1
544163.20170919.2.1.mhd	4
544224.20170918.2.1.mhd	4
544281.20170922.2.1.mhd	1
544342.20170922.2.1.mhd	1
544387.20170924.2.1.mhd	4
544437.20170925.2.1.mhd	1
544457.20170921.2.1.mhd	4
544464.20170924.2.1.mhd	4
544572.20170925.2.1.mhd	1
544584.20170924.2.1.mhd	1
544780.20170927.2.1.mhd	4
544802.20180403.2.1.mhd	4
544845.20170928.2.1.mhd	1
544862.20170928.2.1.mhd	4
544921.20171001.2.1.mhd	1
544995.20171002.2.1.mhd	4
545014.20171006.2.1.mhd	1
545046.20171004.2.1.mhd	1
545065.20171006.2.1.mhd	1
545098.20171006.2.1.mhd	1
545354.20171008.2.1.mhd	4
545436.20171009.2.1.mhd	1
545867.20171014.2.1.mhd	4
546000.20171014.2.1.mhd	1
546239.20171016.2.1.mhd	1
546325.20171018.2.1.mhd	2
546363.20171019.2.1.mhd	4
546366.20171018.2.1.mhd	1
546418.20171018.2.1.mhd	1
546456.20171019.2.1.mhd	4
546642.20171021.2.1.mhd	4
546972.20171025.2.1.mhd	1
547101.20171026.2.1.mhd	1
547200.20171029.2.1.mhd	1
547205.20171029.2.1.mhd	4
547208.20171030.2.1.mhd	4
547276.20171026.2.1.mhd	4
547356.20171028.2.1.mhd	1
547471.20171031.2.1.mhd	4
547517.20171031.2.1.mhd	4
547518.20171030.2.1.mhd	4
547521.20171030.2.1.mhd	1
547522.20171028.2.1.mhd	4
547553.20171101.2.1.mhd	1
547581.20171101.2.1.mhd	1
547623.20171102.2.1.mhd	4
547635.20171101.2.1.mhd	4
547704.20171102.2.1.mhd	4
547744.20171102.2.1.mhd	1
547827.20171102.2.1.mhd	1
547854.20171105.2.1.mhd	2
547926.20171106.2.1.mhd	1
547932.20171104.2.1.mhd	4
547965.20171104.2.1.mhd	4
548086.20171107.2.1.mhd	4
548305.20171108.2.1.mhd	4
548312.20171109.2.1.mhd	4
548446.20171107.2.1.mhd	4
548472.20171109.2.1.mhd	4
548515.20171110.2.1.mhd	1
548518.20171110.2.1.mhd	1
548617.20171110.2.1.mhd	4
548633.20171111.2.1.mhd	4
548733.20171106.2.1.mhd	4
548736.20171110.2.1.mhd	4
548850.20171114.2.1.mhd	4
548851.20171108.2.1.mhd	4
548984.20171115.3.1.mhd	4
548987.20171115.2.1.mhd	1
548990.20171116.2.1.mhd	1
549107.20171102.2.1.mhd	2
549145.20171117.3.1.mhd	2
549171.20171117.2.1.mhd	1
549174.20171118.2.1.mhd	1
549263.20171119.2.1.mhd	2
549291.20171115.2.1.mhd	4
549334.20171118.2.1.mhd	1
549412.20171119.2.1.mhd	4
549414.20171118.2.1.mhd	1
549609.20171122.2.1.mhd	4
549700.20171122.2.1.mhd	2
549800.20171122.2.1.mhd	1
551013.20171124.2.1.mhd	4
551057.20171124.2.1.mhd	1
551072.20171124.2.1.mhd	1
551074.20171124.2.1.mhd	1
551079.20171125.2.1.mhd	1
551170.20171119.2.1.mhd	4
551178.20171122.2.1.mhd	4
551185.20171126.2.1.mhd	1
551449.20171130.2.1.mhd	4
551487.20171128.2.1.mhd	1
551520.20170511.2.1.mhd	3
551529.20171201.2.1.mhd	2
551659.20171130.2.1.mhd	4
551728.20171202.2.1.mhd	1
551806.20171130.2.1.mhd	4
551834.20171203.2.1.mhd	1
551967.20171204.2.1.mhd	4
552048.20171205.2.1.mhd	1
552086.20171203.2.1.mhd	4
552087.20171205.2.1.mhd	4
552089.20171205.2.1.mhd	1
552090.20171205.2.1.mhd	1
552103.20171206.2.1.mhd	4
552175.20171206.2.1.mhd	2
552238.20171206.2.1.mhd	1
552239.20171202.2.1.mhd	4
552242.20171129.2.1.mhd	4
552618.20171211.2.1.mhd	4
552687.20171202.2.1.mhd	4
552749.20171212.2.1.mhd	2
552752.20171206.2.1.mhd	1
552859.20171211.2.1.mhd	2
552879.20171211.2.1.mhd	4
552946.20171214.2.1.mhd	2
552957.20171213.2.1.mhd	1
553050.20171204.2.1.mhd	4
553054.20171214.2.1.mhd	1
553109.20171201.2.1.mhd	1
553143.20171217.2.1.mhd	1
553217.20171217.2.1.mhd	1
553298.20171213.2.1.mhd	4
553299.20171214.2.1.mhd	4
553350.20171214.2.1.mhd	4
553487.20171213.2.1.mhd	4
553494.20171219.2.1.mhd	4
553577.20171220.2.1.mhd	1
553578.20171221.2.1.mhd	4
553579.20171220.2.1.mhd	1
553592.20171219.2.1.mhd	1
553595.20171220.2.1.mhd	1
553597.20171220.2.1.mhd	4
553664.20171221.2.1.mhd	1
553700.20171222.2.1.mhd	1
553707.20171221.2.1.mhd	2
553768.20171224.2.1.mhd	4
553770.20171223.2.1.mhd	1
553779.20171223.2.1.mhd	1
553825.20171224.2.1.mhd	4
553883.20171220.2.1.mhd	2
553981.20171225.2.1.mhd	2
554051.20171213.2.1.mhd	4
554067.20171225.2.1.mhd	1
554070.20171225.2.1.mhd	4
554077.20171225.2.1.mhd	1
554079.20171225.2.1.mhd	1
554197.20171226.3.1.mhd	1
554204.20171223.2.1.mhd	4
554207.20171222.2.1.mhd	4
554361.20171229.2.1.mhd	4
554407.20171228.2.1.mhd	1
554419.20171229.2.1.mhd	1
554482.20171230.2.1.mhd	1
554502.20171230.2.1.mhd	1
554506.20171231.3.1.mhd	4
554550.20171231.2.1.mhd	1
554649.20171230.2.1.mhd	4
554834.20171231.3.1.mhd	4
554840.20180102.2.1.mhd	1
554902.20180103.2.1.mhd	4
554945.20180110.2.1.mhd	1
554961.20171230.2.1.mhd	4
554964.20180103.2.1.mhd	1
555103.20180104.2.1.mhd	2
555144.20180106.2.1.mhd	4
555156.20180106.2.1.mhd	4
555204.20180107.2.1.mhd	1
555205.20180106.2.1.mhd	1
555298.20180104.2.1.mhd	4
555501.20180107.2.1.mhd	4
555576.20180110.2.1.mhd	2
555833.20180111.2.1.mhd	1
556061.20180114.2.1.mhd	1
556184.20180116.2.1.mhd	4
556206.20180123.2.1.mhd	4
556339.20180116.2.1.mhd	1
556375.20180118.2.1.mhd	1
556432.20180114.2.1.mhd	4
556445.20180116.2.1.mhd	1
556562.20180118.2.1.mhd	1
556634.20180118.2.1.mhd	2
556645.20180119.2.1.mhd	4
556662.20180120.2.1.mhd	4
556671.20180120.2.1.mhd	1
556743.20180123.2.1.mhd	1
556788.20180119.2.1.mhd	1
556802.20180121.2.1.mhd	1
556837.20180117.2.1.mhd	1
556886.20180121.2.1.mhd	4
556950.20180123.2.1.mhd	4
557009.20180123.2.1.mhd	1
557012.20180120.2.1.mhd	4
557135.20180124.2.1.mhd	4
557293.20180126.2.1.mhd	4
557301.20180127.2.1.mhd	1
557303.20180126.2.1.mhd	1
557313.20180127.2.1.mhd	2
557316.20180127.2.1.mhd	1
557389.20180121.2.1.mhd	4
557402.20180128.2.1.mhd	1
557423.20180126.2.1.mhd	1
557432.20180124.3.1.mhd	4
557494.20180128.2.1.mhd	1
557634.20180130.2.1.mhd	4
557737.20180131.2.1.mhd	4
557859.20180131.2.1.mhd	4
557868.20180202.2.1.mhd	1
557912.20180202.2.1.mhd	1
557920.20180202.2.1.mhd	1
557924.20180202.2.1.mhd	1
557925.20180203.2.1.mhd	1
557931.20180204.2.1.mhd	1
557996.20180205.2.1.mhd	4
558018.20180205.2.1.mhd	1
558146.20180205.2.1.mhd	4
558161.20180205.2.1.mhd	1
558198.20180206.2.1.mhd	4
558217.20180206.2.1.mhd	4
558282.20180206.2.1.mhd	4
558441.20180209.2.1.mhd	1
558603.20180212.2.1.mhd	4
558604.20180213.2.1.mhd	4
558641.20180207.2.1.mhd	4
558647.20180212.2.1.mhd	1
558649.20180213.2.1.mhd	1
558650.20180213.2.1.mhd	1
558655.20180213.2.1.mhd	4
558660.20180211.2.1.mhd	1
558680.20180213.2.1.mhd	4
558681.20180214.2.1.mhd	1
558695.20180215.2.1.mhd	2
558697.20180211.2.1.mhd	2
558703.20180215.2.1.mhd	4
558705.20180215.2.1.mhd	1
558726.20180203.2.1.mhd	1
558732.20180216.2.1.mhd	1
558745.20180216.2.1.mhd	4
558760.20180218.2.1.mhd	1
558848.20180220.2.1.mhd	1
558850.20180221.2.1.mhd	1
558854.20180220.2.1.mhd	4
558999.20180220.2.1.mhd	1
559038.20180221.2.1.mhd	1
559183.20180221.2.1.mhd	4
559184.20180222.2.1.mhd	1
559188.20180217.2.1.mhd	3
559198.20180221.2.1.mhd	4
559219.20180221.2.1.mhd	1
559295.20180223.2.1.mhd	4
559491.20180219.2.1.mhd	2
559504.20180211.2.1.mhd	2
559573.20180224.2.1.mhd	2
559577.20180227.2.1.mhd	1
559622.20180227.3.1.mhd	1
559682.20180222.2.1.mhd	4
559711.20180225.2.1.mhd	4
559747.20180227.2.1.mhd	2
559800.20180301.2.1.mhd	1
559802.20180228.2.1.mhd	4
559899.20180215.2.1.mhd	1
559904.20180301.2.1.mhd	1
559915.20180301.2.1.mhd	1
559936.20180302.2.1.mhd	4
559981.20180303.2.1.mhd	1
560164.20180304.2.1.mhd	1
560165.20180304.2.1.mhd	1
560267.20180305.2.1.mhd	1
560379.20180306.2.1.mhd	1
560501.20180308.2.1.mhd	1
560504.20180308.2.1.mhd	3
560538.20180307.2.1.mhd	4
560709.20180310.2.1.mhd	1
560832.20180315.2.1.mhd	1
560931.20180310.2.1.mhd	4
560937.20180311.3.1.mhd	4
561210.20180329.2.1.mhd	4
561297.20180315.2.1.mhd	1
561418.20180317.2.1.mhd	1
561442.20180317.2.1.mhd	4
561537.20180316.3.1.mhd	1
561539.20180318.2.1.mhd	1
561787.20180320.2.1.mhd	1
562009.20180322.2.1.mhd	1
562277.20180326.2.1.mhd	4
562451.20180327.2.1.mhd	1
562462.20180328.2.1.mhd	1
562475.20180323.2.1.mhd	4
562577.20180329.2.1.mhd	1
562632.20180329.2.1.mhd	1
562663.20180329.2.1.mhd	1
562729.20180329.2.1.mhd	4
562731.20180331.2.1.mhd	4
562742.20180325.2.1.mhd	4
562761.20180331.2.1.mhd	4
562762.20180331.2.1.mhd	1
562826.20180401.2.1.mhd	1
562828.20180329.2.1.mhd	4
562880.20180411.2.1.mhd	2
562972.20180403.2.1.mhd	4
563011.20180402.2.1.mhd	1
563136.20180405.2.1.mhd	1
563153.20180406.2.1.mhd	1
563225.20180407.2.1.mhd	1
563244.20180406.2.1.mhd	2
563247.20180405.2.1.mhd	2
563310.20180408.2.1.mhd	1
563390.20180404.2.1.mhd	1
563406.20180406.2.1.mhd	4
563474.20180409.2.1.mhd	1
563531.20180410.2.1.mhd	1
563536.20180410.2.1.mhd	4
563842.20180413.2.1.mhd	4
563975.20180413.2.1.mhd	2
564004.20180410.2.1.mhd	1
564047.20180412.2.1.mhd	4
564060.20180416.2.1.mhd	1
564235.20180413.2.1.mhd	1
564403.20180415.2.1.mhd	4
564482.20180419.2.1.mhd	1
564487.20180419.2.1.mhd	4
564673.20180420.2.1.mhd	1
564678.20180422.2.1.mhd	1
564680.20180421.2.1.mhd	1
564762.20180421.2.1.mhd	1
564975.20180424.2.1.mhd	1
565026.20180424.2.1.mhd	1
565038.20180418.2.1.mhd	2
565143.20180426.2.1.mhd	1
565149.20180422.2.1.mhd	4
565313.20180427.2.1.mhd	4
565545.20180330.2.1.mhd	1
565672.20180428.2.1.mhd	4
1006875.20150505.2.1.mhd	cm
1011700.20150602.2.1.mhd	cm
1012307.20150531.2.1.mhd	cm
273423.20180410.2.1.mhd	ca
364178.20110709.2.1.mhd	an
368398.20110926.2.1.mhd	ht
372863.20171012.2.1.mhd	transformation
373721.20120104.2.1.mhd	ht
374072.20120105.2.1.mhd	ht
374273.20120105.2.1.mhd	ht
374503.20120109.2.1.mhd	ht
374702.20120110.2.1.mhd	an
375725.20120126.2.32.mhd	tumor
376320.20120214.2.1.mhd	ht
376471.20120213.2.1.mhd	ht
376696.20120216.3.1.mhd	crypt
377022.20120211.2.1.mhd	ht
377587.20120220.1.1.mhd	ht
377599.20120219.2.1.mhd	an
378898.20120326.2.1.mhd	crypt
379071.20120313.2.1.mhd	ht
379217.20120313.2.1.mhd	an
379365.20120317.2.1.mhd	an
381715.20120414.2.1.mhd	an
383170.20120429.2.1.mhd	ht
384011.20120504.2.1.mhd	ht
384889.20120531.2.1.mhd	an
386647.20120617.1.28.mhd	ht
386792.20120618.2.1.mhd	ht
391592.20120821.2.1.mhd	psah
392018.20170915.2.1.mhd	cm
392137.20120821.2.1.mhd	ht
394441.20120925.2.1.mhd	cm
395818.20121019.2.1.mhd	an
398380.20121123.2.1.mhd	an
399754.20120821.2.1.mhd	an
399850.20121207.2.1.mhd	avm
418491.20130805.2.1.mhd	mmd
419002.20130817.2.1.mhd	ht
419786.20130901.2.1.mhd	an
420567.20130916.2.1.mhd	an
428542.20140101.2.1.mhd	ht
429570.20140107.2.1.mhd	ht
429662.20140106.2.1.mhd	avm
429860.20140108.2.1.mhd	avm
429934.20140105.2.1.mhd	ht
429940.20140111.2.1.mhd	ht
430080.20140113.2.1.mhd	an
430454.20140114.2.1.mhd	ht
430467.20140120.2.1.mhd	csvt
430537.20140119.2.1.mhd	an
430707.20140119.2.1.mhd	mmd
431228.20140201.2.1.mhd	an
431562.20140208.2.1.mhd	avm
433027.20140226.3.1.mhd	ht
434585.20140315.2.1.mhd	tumor
435036.20140322.2.1.mhd	an
436103.20140310.2.1.mhd	an
438415.20140501.2.1.mhd	avm
438712.20140506.2.1.mhd	an
450446.20141009.2.1.mhd	mmd
465562.20150408.2.1.mhd	an
465893.20150416.2.1.mhd	tumor
465946.20150414.2.1.mhd	ht
466088.20150418.2.1.mhd	ca
466093.20150421.2.1.mhd	ht
466156.20150423.2.1.mhd	ht
466259.20150416.2.1.mhd	an
466407.20150420.2.1.mhd	ht
466600.20150424.2.1.mhd	transformation
466659.20150419.2.1.mhd	ht
466687.20150421.2.1.mhd	an
466693.20150425.2.1.mhd	an
466784.20150426.2.1.mhd	ht
466920.20150424.2.1.mhd	an
467082.20150429.2.1.mhd	ht
467164.20150419.2.1.mhd	ht
467181.20150503.2.1.mhd	an
467187.20150503.2.1.mhd	an
467459.20150504.2.1.mhd	an
467526.20150509.2.1.mhd	an
467715.20150429.2.1.mhd	cd
467797.20150504.3.1.mhd	ht
467834.20150505.2.1.mhd	ht
468293.20150516.2.1.mhd	crypt
468504.20150509.2.1.mhd	avm
468717.20150518.2.1.mhd	ht
468877.20150518.2.1.mhd	crypt
469092.20150523.2.1.mhd	an
469103.20150520.2.1.mhd	ht
469109.20150517.3.1.mhd	an
469141.20150530.2.1.mhd	ht
469221.20150523.2.1.mhd	ht
469253.20150524.2.1.mhd	an
469331.20150525.2.1.mhd	mmd
469356.20150523.2.1.mhd	an
469476.20150527.2.1.mhd	an
469511.20150514.2.1.mhd	an
469572.20150523.2.1.mhd	ht
469606.20150524.2.1.mhd	crypt
469660.20150527.2.1.mhd	an
469801.20150527.2.1.mhd	ht
469823.20150531.2.1.mhd	an
469884.20150527.2.1.mhd	an
470176.20150607.2.1.mhd	an
470180.20150607.2.1.mhd	ht
470373.20150608.2.1.mhd	an
470413.20150605.2.1.mhd	an
470822.20150606.3.1.mhd	ht
470859.20150607.2.1.mhd	an
471059.20150614.2.1.mhd	an
471097.20150613.2.1.mhd	an
471113.20150612.2.1.mhd	ht
471246.20150615.2.1.mhd	ht
471391.20150620.2.1.mhd	avm
471623.20150622.2.1.mhd	crypt
471625.20150622.2.1.mhd	an
471640.20150622.2.1.mhd	an
472140.20150627.2.1.mhd	an
478436.20150904.2.1.mhd	ht
479302.20150919.2.1.mhd	ht
479353.20150928.2.1.mhd	ht
480856.20151012.2.1.mhd	ht
480969.20151016.2.1.mhd	an
481029.20151018.2.1.mhd	an
481053.20151017.2.1.mhd	an
481466.20151022.2.1.mhd	crypt
482296.20151019.2.1.mhd	an
482915.20151107.2.1.mhd	an
485022.20151206.2.1.mhd	ht
489294.20160201.2.1.mhd	ht
497127.20160423.3.1.mhd	ht
498160.20160509.2.1.mhd	an
500606.20160607.2.1.mhd	an
503613.20160711.2.1.mhd	ht
508689.20160921.2.1.mhd	ht
515129.20161127.2.1.mhd	an
515338.20161208.2.1.mhd	an
517152.20161222.2.1.mhd	ht
519524.20170118.2.1.mhd	ht
538472.20170720.2.1.mhd	sdh
541769.20170827.2.1.mhd	transformation
542196.20170830.3.1.mhd	psah
542735.20170831.2.1.mhd	ca
543053.20170909.2.1.mhd	an
543193.20170716.2.1.mhd	sdh
543363.20170911.2.1.mhd	tumor
544165.20170919.2.1.mhd	psah
544169.20170919.2.1.mhd	sdh
544589.20170926.2.1.mhd	transformation
544913.20170930.2.1.mhd	sdh
544964.20171016.2.1.mhd	transformation
545049.20171005.6.1.mhd	an
545881.20171014.2.1.mhd	psah
546003.20171015.2.1.mhd	cm
546139.20171004.2.1.mhd	mmd
546519.20171020.2.1.mhd	transformation
546978.20171022.2.1.mhd	ht
547121.20171025.2.1.mhd	transformation
547746.20171102.2.1.mhd	an
547804.20171103.2.1.mhd	tumor
548186.20171109.2.1.mhd	sdh
548189.20171108.2.1.mhd	crypt
548447.20171110.2.1.mhd	psah
548457.20171110.2.1.mhd	ht
549279.20171106.2.1.mhd	ht
549341.20171120.2.1.mhd	sdh
549710.20171122.2.1.mhd	csvt
551737.20171201.2.1.mhd	tumor
552212.20171207.2.1.mhd	sdh
552454.20171210.2.1.mhd	ht
552525.20171208.2.1.mhd	csvt
552558.20171211.2.1.mhd	crypt
552672.20171211.2.1.mhd	psah
553038.20171215.2.1.mhd	sdh
553348.20171218.2.1.mhd	an
553584.20171215.2.1.mhd	transformation
553638.20171221.2.1.mhd	csvt
553821.20171224.2.1.mhd	crypt
554132.20171226.2.1.mhd	sdh
554218.20171225.2.1.mhd	crypt
554315.20171227.2.1.mhd	psah
554755.20180102.2.1.mhd	sdh
555208.20180107.2.1.mhd	tumor
555361.20180104.2.1.mhd	crypt
555447.20171231.2.1.mhd	ht
555451.20180108.2.1.mhd	psah
556957.20180120.2.1.mhd	tumor
557187.20180125.2.1.mhd	sdh
557635.20180131.2.1.mhd	cd
558538.20180214.2.1.mhd	avf
558708.20180204.2.1.mhd	psah
558744.20180218.2.1.mhd	an
559454.20180225.2.1.mhd	cd
559482.20180221.2.1.mhd	ca
560457.20171225.2.1.mhd	sdh
561438.20180317.2.1.mhd	cd
562471.20180322.2.1.mhd	transformation
562525.20180328.2.1.mhd	sdh
562980.20180329.2.1.mhd	ca
563023.20180401.2.1.mhd	sdh
564361.20180412.2.1.mhd	cd
564510.20180410.2.1.mhd	tumor
564771.20180422.3.1.mhd	psah
565398.20180427.2.1.mhd	cm
864632.20130423.2.1.mhd	cm
941350.20140520.2.1.mhd	cm
943163.20140528.2.1.mhd	cm
944442.20140607.2.1.mhd	mmd
954755.20140725.2.1.mhd	mmd
960112.20140823.2.1.mhd	cm
998495.20150320.2.1.mhd	mmd
NCT177352.20180312.2.1.mhd	cm
NCT65549.20160713.2.1.mhd	cm
240361.20161013.2.1.mhd	crypt
379909.20160122.2.1.mhd	ca
473060.20150706.2.1.mhd	crypt
473674.20150718.2.1.mhd	crypt
473757.20150705.2.1.mhd	tumor
474039.20150721.2.1.mhd	cm
474603.20150728.2.1.mhd	avf
474841.20150804.3.1.mhd	transformation
474913.20150809.2.1.mhd	transformation
475211.20150806.2.1.mhd	crypt
475413.20150806.2.1.mhd	crypt
475424.20150807.2.1.mhd	crypt
476794.20150817.2.1.mhd	crypt
477558.20150904.2.1.mhd	transformation
477831.20150901.2.1.mhd	csvt
478073.20151008.2.1.mhd	cm
478077.20150929.2.1.mhd	ca
478096.20151002.2.1.mhd	tumor
478102.20150909.2.1.mhd	cd
478219.20150916.2.1.mhd	transformation
479569.20151002.2.1.mhd	crypt
480516.20151009.2.1.mhd	avf
481546.20151022.2.1.mhd	avf
482271.20151009.2.1.mhd	crypt
483158.20151022.2.1.mhd	cm
483158.20151023.2.1.mhd	cm
483500.20151116.2.1.mhd	tumor
483660.20151109.2.1.mhd	tumor
484337.20151126.2.1.mhd	crypt
484670.20151126.2.1.mhd	transformation
484813.20151130.2.1.mhd	transformation
485175.20151205.2.1.mhd	psah
485278.20151206.2.1.mhd	crypt
485411.20151208.2.1.mhd	crypt
486129.20151219.2.1.mhd	vm
486219.20151219.2.1.mhd	crypt
486302.20151217.2.1.mhd	tumor
487747.20160109.2.1.mhd	ca
488235.20160113.2.1.mhd	psah
488586.20160120.2.1.mhd	csvt
489050.20170728.2.1.mhd	crypt
489332.20160208.2.1.mhd	avf
489472.20160131.2.1.mhd	cm
490538.20160218.2.1.mhd	cm
490969.20160224.2.1.mhd	crypt
492363.20160308.2.1.mhd	ca
492577.20160307.2.1.mhd	avf
493233.20160314.2.1.mhd	an
493652.20160314.2.1.mhd	cm
493898.20160330.2.1.mhd	ca
494161.20160321.2.1.mhd	transformation
494275.20160329..936.33126.2.1.mhd	cm
494425.20160325.3.1.mhd	avf
494668.20160327.2.1.mhd	ca
495885.20160413.2.1.mhd	csvt
497433.20160427.2.1.mhd	ca
497523.20160501.2.1.mhd	transformation
498088.20160506.2.1.mhd	an
498565.20160515.2.1.mhd	ca
498676.20160524.2.1.mhd	cm
499046.20160611.2.1.mhd	crypt
499223.20160519.2.1.mhd	crypt
499872.20160529.2.1.mhd	crypt
499895.20160604.2.1.mhd	tumor
499976.20160531.2.1.mhd	crypt
500170.20161029.3.1.mhd	csvt
500222.20160601.2.1.mhd	avf
500577.20160603.2.1.mhd	cm
501517.20160618.2.1.mhd	tumor
502614.20160629.2.1.mhd	transformation
503216.20160708.2.1.mhd	crypt
504054.20160716.2.1.mhd	csvt
504227.20160721.2.1.mhd	crypt
504465.20160711.2.1.mhd	cm
504536.20160724.2.1.mhd	psah
504764.20160725.2.1.mhd	crypt
505019.20160729.2.1.mhd	crypt
505334.20160730.2.1.mhd	crypt
505438.20160730.2.1.mhd	ca
505542.20160806.2.1.mhd	transformation
505739.20160804.2.1.mhd	crypt
506775.20160603.2.1.mhd	tumor
506930.20160820.2.1.mhd	cm
507864.20160827.2.1.mhd	crypt
508435.20160930.2.1.mhd	crypt
508436.20161001.2.1.mhd	crypt
508440.20161003.2.1.mhd	Leukemia
508938.20160930.2.1.mhd	infection
508944.20160929.2.1.mhd	crypt
509291.20160909.2.1.mhd	csvt
509371.20160915.2.1.mhd	crypt
509473.20160921.2.1.mhd	immune disease
509487.20160909.2.1.mhd	tumor
510088.20161001.2.1.mhd	crypt
510216.20161004.2.1.mhd	crypt
510285.20160926.2.1.mhd	crypt
510411.20160928.2.1.mhd	crypt
510462.20161004.2.1.mhd	crypt
511156.20161011.2.1.mhd	an
511218.20161015.2.1.mhd	crypt
511491.20161013.2.1.mhd	cm
512026.20161027.2.1.mhd	crypt
512221.20161215.2.1.mhd	crypt
512833.20161101.2.1.mhd	crypt
513173.20161108.2.1.mhd	csvt
513263.20161104.2.1.mhd	crypt
513637.20161110.2.1.mhd	psah
513655.20161110.2.1.mhd	cm
513884.20161114.2.1.mhd	transformation
514611.20161111.2.1.mhd	ca
517474.20161226.2.1.mhd	cm
517676.20161222.2.1.mhd	tumor
517748.20161224.2.1.mhd	crypt
518000.20160920.2.1.mhd	cm
518486.20170108.2.1.mhd	crypt
518674.20170109.2.1.mhd	psah
518832.20170110.2.1.mhd	crypt
518866.20170109.2.1.mhd	csvt
518883.20170112.2.1.mhd	an
519393.20170117.2.1.mhd	crypt
519715.20170121.2.1.mhd	crypt
519795.20170121.2.1.mhd	crypt
519854.20170122.2.1.mhd	crypt
520620.20170126.2.1.mhd	crypt
520645.20170124.2.1.mhd	transformation
521213.20170203.2.1.mhd	crypt
521523.20170205.2.1.mhd	transformation
521551.20170131.2.1.mhd	crypt
521968.20170212.2.1.mhd	crypt
522420.20170215.2.1.mhd	crypt
522567.20170214.2.1.mhd	transformation
522860.20170220.2.1.mhd	psah
523273.20170226.2.1.mhd	crypt
524866.20170309.2.1.mhd	cm
525583.20170310.2.1.mhd	psah
526092.20170327.2.1.mhd	csvt
526671.20170331.2.1.mhd	csvt
527181.20170406.2.1.mhd	crypt
528703.20170420.2.1.mhd	cm
530182.20170504.2.1.mhd	avf
530556.20170507.2.1.mhd	crypt
530589.20170506.2.1.mhd	crypt
531614.20170517.2.1.mhd	crypt
531915.20170520.2.1.mhd	tumor
532016.20170519.2.1.mhd	crypt
533501.20170527.2.1.mhd	crypt
533526.20170529.2.1.mhd	crypt
533627.20170529.2.1.mhd	ca
534161.20170531.2.1.mhd	crypt
534231.20170605.2.1.mhd	crypt
534786.20170614.2.1.mhd	cm
535132.20170620.2.1.mhd	cm
535282.20170406.2.1.mhd	cm
536441.20170620.2.1.mhd	crypt
536591.20170630.2.1.mhd	csvt
536632.20170623.2.1.mhd	crypt
538854.20170723.2.1.mhd	transformation
539459.20170729.2.1.mhd	cd
539587.20170731.3.1.mhd	crypt
539983.20170806.2.1.mhd	psah
540448.20170809.2.1.mhd	crypt
540836.20170816.2.1.mhd	crypt
540850.20170816.2.1.mhd	crypt
540921.20170325.2.1.mhd	crypt
541146.20170819.2.1.mhd	crypt
541833.20170828.2.1.mhd	crypt
542536.20170903.2.1.mhd	csvt
544462.20170922.2.1.mhd	crypt
544770.20170922.5.1.mhd	Platelet reduce

## Sheet: Sheet2
name	label
1006875.20150505.2.1.mhd	5
1011700.20150602.2.1.mhd	5
1012307.20150531.2.1.mhd	5
141084.20170909.2.1.mhd	1
240361.20161013.2.1.mhd	6
254258.20171012.2.1.mhd	4
273423.20180410.2.1.mhd	6
281422.20171023.2.1.mhd	4
312194.20160210.2.1.mhd	1
320261.20171004.2.1.mhd	1
325155.20160501.2.1.mhd	4
346863.20171120.2.1.mhd	4
355220.20151124.2.1.mhd	4
362503.20161012.2.1.mhd	4
364178.20110709.2.1.mhd	1
368398.20110926.2.1.mhd	4
372863.20171012.2.1.mhd	6
373721.20120104.2.1.mhd	4
374072.20120105.2.1.mhd	4
374273.20120105.2.1.mhd	4
374503.20120109.2.1.mhd	4
374702.20120110.2.1.mhd	1
375725.20120126.2.32.mhd	6
376320.20120214.2.1.mhd	4
376471.20120213.2.1.mhd	4
376696.20120216.3.1.mhd	6
377022.20120211.2.1.mhd	4
377587.20120220.1.1.mhd	4
377599.20120219.2.1.mhd	1
378898.20120326.2.1.mhd	6
379071.20120313.2.1.mhd	4
379217.20120313.2.1.mhd	1
379365.20120317.2.1.mhd	1
379909.20160122.2.1.mhd	6
380958.20160921.2.1.mhd	1
381715.20120414.2.1.mhd	1
383170.20120429.2.1.mhd	4
383938.20170719.2.1.mhd	1
384011.20120504.2.1.mhd	4
384889.20120531.2.1.mhd	1
386647.20120617.1.28.mhd	4
386792.20120618.2.1.mhd	4
391592.20120821.2.1.mhd	6
392018.20170915.2.1.mhd	5
392137.20120821.2.1.mhd	4
394441.20120925.2.1.mhd	5
394947.20151204.2.1.mhd	4
395818.20121019.2.1.mhd	1
398169.20151216.2.1.mhd	4
398380.20121123.2.1.mhd	1
399754.20120821.2.1.mhd	1
399850.20121207.2.1.mhd	2
403589.20160511.2.1.mhd	4
407596.20150829.2.1.mhd	4
418491.20130805.2.1.mhd	3
419002.20130817.2.1.mhd	4
419786.20130901.2.1.mhd	1
420567.20130916.2.1.mhd	1
422297.20170304.2.1.mhd	4
425445.20160402.3.1.mhd	4
428542.20140101.2.1.mhd	4
429088.20151114.2.1.mhd	4
429570.20140107.2.1.mhd	4
429662.20140106.2.1.mhd	2
429860.20140108.2.1.mhd	2
429934.20140105.2.1.mhd	4
429940.20140111.2.1.mhd	4
430080.20140113.2.1.mhd	1
430454.20140114.2.1.mhd	4
430467.20140120.2.1.mhd	6
430537.20140119.2.1.mhd	1
430707.20140119.2.1.mhd	3
431228.20140201.2.1.mhd	1
431562.20140208.2.1.mhd	2
433027.20140226.3.1.mhd	4
434581.20151224.2.1.mhd	3
434585.20140315.2.1.mhd	6
435036.20140322.2.1.mhd	1
436103.20140310.2.1.mhd	1
438415.20140501.2.1.mhd	2
438712.20140506.2.1.mhd	1
448596.20161213.2.1.mhd	4
450446.20141009.2.1.mhd	3
457834.20151102.2.1.mhd	4
460146.20161003.2.1.mhd	4
464395.20180201.2.1.mhd	4
465562.20150408.2.1.mhd	1
465893.20150416.2.1.mhd	6
465946.20150414.2.1.mhd	4
466088.20150418.2.1.mhd	6
466093.20150421.2.1.mhd	4
466156.20150423.2.1.mhd	4
466259.20150416.2.1.mhd	1
466407.20150420.2.1.mhd	4
466600.20150424.2.1.mhd	6
466659.20150419.2.1.mhd	4
466687.20150421.2.1.mhd	1
466693.20150425.2.1.mhd	1
466784.20150426.2.1.mhd	4
466920.20150424.2.1.mhd	1
467082.20150429.2.1.mhd	4
467164.20150419.2.1.mhd	4
467181.20150503.2.1.mhd	1
467187.20150503.2.1.mhd	1
467459.20150504.2.1.mhd	1
467526.20150509.2.1.mhd	1
467715.20150429.2.1.mhd	6
467797.20150504.3.1.mhd	4
467834.20150505.2.1.mhd	4
468293.20150516.2.1.mhd	6
468504.20150509.2.1.mhd	2
468717.20150518.2.1.mhd	4
468877.20150518.2.1.mhd	6
469092.20150523.2.1.mhd	1
469103.20150520.2.1.mhd	4
469109.20150517.3.1.mhd	1
469141.20150530.2.1.mhd	4
469221.20150523.2.1.mhd	4
469253.20150524.2.1.mhd	1
469331.20150525.2.1.mhd	3
469356.20150523.2.1.mhd	1
469476.20150527.2.1.mhd	1
469511.20150514.2.1.mhd	1
469572.20150523.2.1.mhd	4
469606.20150524.2.1.mhd	6
469660.20150527.2.1.mhd	1
469801.20150527.2.1.mhd	4
469823.20150531.2.1.mhd	1
469884.20150527.2.1.mhd	1
469884.20150531.2.1.mhd	1
470176.20150607.2.1.mhd	1
470180.20150607.2.1.mhd	4
470373.20150608.2.1.mhd	1
470413.20150605.2.1.mhd	1
470646.20150614.2.1.mhd	1
470822.20150606.3.1.mhd	4
470859.20150607.2.1.mhd	1
471059.20150614.2.1.mhd	1
471097.20150613.2.1.mhd	1
471113.20150612.2.1.mhd	4
471246.20150615.2.1.mhd	4
471391.20150620.2.1.mhd	2
471623.20150622.2.1.mhd	6
471625.20150622.2.1.mhd	1
471640.20150622.2.1.mhd	1
471676.20150702.2.1.mhd	4
472112.20150627.2.1.mhd	4
472140.20150627.2.1.mhd	1
472211.20150628.2.1.mhd	1
472254.20150627.2.1.mhd	2
472664.20150702.2.1.mhd	1
472689.20150704.2.1.mhd	1
472761.20150703.2.1.mhd	1
472790.20150705.2.1.mhd	1
472797.20150709.2.1.mhd	1
472835.20150713.2.1.mhd	4
473060.20150706.2.1.mhd	6
473128.20150712.2.1.mhd	1
473143.20150711.2.1.mhd	2
473153.20150708.2.1.mhd	4
473318.20150714.2.1.mhd	1
473336.20150714.2.1.mhd	1
473517.20150715.2.1.mhd	1
473541.20150714.2.1.mhd	1
473674.20150718.2.1.mhd	6
473727.20150717.3.1.mhd	1
473757.20150705.2.1.mhd	6
473842.20150722.2.1.mhd	1
473879.20150719.2.1.mhd	1
473880.20150720.2.1.mhd	1
474039.20150721.2.1.mhd	5
474093.20150726.2.1.mhd	4
474228.20150721.2.1.mhd	4
474229.20150723.2.1.mhd	1
474316.20150725.2.1.mhd	1
474378.20150726.2.1.mhd	1
474447.20150729.2.1.mhd	1
474480.20150726.2.1.mhd	4
474556.20150727.2.1.mhd	4
474595.20150730.2.1.mhd	1
474603.20150728.2.1.mhd	6
474655.20150729.2.1.mhd	1
474725.20150804.2.1.mhd	1
474741.20150808.2.1.mhd	2
474755.20150728.2.1.mhd	1
474789.20150803.2.1.mhd	1
474838.20150804.2.1.mhd	1
474841.20150804.3.1.mhd	6
474860.20150801.2.1.mhd	1
474911.20150731.2.1.mhd	1
474913.20150809.2.1.mhd	6
475085.20150806.2.1.mhd	1
475088.20150805.2.1.mhd	2
475207.20150804.2.1.mhd	1
475211.20150806.2.1.mhd	6
475399.20150806.2.1.mhd	2
475413.20150806.2.1.mhd	6
475418.20150805.2.1.mhd	1
475420.20150809.2.1.mhd	1
475424.20150807.2.1.mhd	6
475437.20150807.2.1.mhd	1
475464.20150808.2.1.mhd	1
475538.20150809.2.1.mhd	1
475572.20150807.2.1.mhd	4
475595.20150806.2.1.mhd	1
475700.20150813.2.1.mhd	1
475703.20150809.2.1.mhd	4
476001.20150816.2.1.mhd	1
476107.20150813.2.1.mhd	1
476120.20150810.2.1.mhd	4
476158.20150814.2.1.mhd	4
476161.20150816.2.1.mhd	4
476210.20150814.2.1.mhd	4
476244.20150822.2.1.mhd	1
476400.20150820.2.1.mhd	1
476427.20150815.2.1.mhd	1
476447.20150822.3.1.mhd	1
476468.20150825.2.1.mhd	3
476531.20150824.2.1.mhd	1
476663.20150823.2.1.mhd	1
476733.20150823.2.1.mhd	4
476777.20150824.2.1.mhd	4
476794.20150817.2.1.mhd	6
476919.20150827.2.1.mhd	3
476934.20150829.2.1.mhd	4
476998.20150826.2.1.mhd	1
477018.20150831.2.1.mhd	1
477059.20150825.2.1.mhd	1
477105.20150424.2.1.mhd	3
477187.20150903.2.1.mhd	4
477234.20150904.2.1.mhd	1
477246.20150905.2.1.mhd	1
477427.20150901.2.1.mhd	4
477517.20150903.2.1.mhd	4
477531.20160310.2.1.mhd	4
477555.20150903.2.1.mhd	4
477558.20150904.2.1.mhd	6
477563.20150904.2.1.mhd	1
477747.20150908.2.1.mhd	4
477788.20150909.2.1.mhd	1
477831.20150901.2.1.mhd	6
477999.20150917.2.1.mhd	1
478073.20151008.2.1.mhd	5
478077.20150929.2.1.mhd	6
478096.20151002.2.1.mhd	6
478102.20150909.2.1.mhd	6
478192.20150909.2.1.mhd	4
478210.20150828.2.1.mhd	4
478219.20150916.2.1.mhd	6
478272.20150913.2.1.mhd	1
478436.20150904.2.1.mhd	4
478444.20150916.2.1.mhd	1
478532.20150910.2.1.mhd	4
478558.20150915.2.1.mhd	1
478664.20150920.2.1.mhd	1
478679.20150918.2.1.mhd	4
478701.20150917.2.1.mhd	1
478718.20150913.2.1.mhd	1
478797.20150919.2.1.mhd	1
478954.20150920.2.1.mhd	1
479096.20150927.2.1.mhd	1
479119.20150922.2.1.mhd	1
479145.20150909.2.1.mhd	4
479190.20151001.2.1.mhd	4
479208.20150923.2.1.mhd	1
479287.20150926.2.1.mhd	1
479302.20150919.2.1.mhd	4
479314.20150925.2.1.mhd	1
479319.20150928.2.1.mhd	1
479353.20150928.2.1.mhd	4
479368.20151001.2.1.mhd	1
479441.20151008.2.1.mhd	4
479559.20150929.2.1.mhd	4
479569.20151002.2.1.mhd	6
479570.20151003.2.1.mhd	1
479572.20151003.2.1.mhd	1
479582.20151005.2.1.mhd	1
479583.20151004.2.1.mhd	1
480048.20151013.2.1.mhd	4
480138.20151005.3.1.mhd	1
480168.20151008.2.1.mhd	1
480393.20151004.2.1.mhd	4
480395.20150916.2.1.mhd	4
480422.20151012.2.1.mhd	1
480516.20151009.2.1.mhd	6
480538.20151009.2.1.mhd	4
480561.20150930.2.1.mhd	1
480566.20151011.2.1.mhd	2
480567.20151011.2.1.mhd	1
480631.20151010.2.1.mhd	1
480672.20151006.2.1.mhd	1
480742.20151014.2.1.mhd	1
480753.20151011.2.1.mhd	1
480824.20151014.2.1.mhd	1
480856.20151012.2.1.mhd	4
480969.20151016.2.1.mhd	1
481029.20151018.2.1.mhd	1
481053.20151017.2.1.mhd	1
481466.20151022.2.1.mhd	6
481546.20151022.2.1.mhd	6
481656.20151024.2.1.mhd	1
481725.20151025.2.1.mhd	1
481742.20151018.2.1.mhd	4
481746.20151025.2.1.mhd	1
481777.20151027.2.1.mhd	1
481814.20151026.2.1.mhd	4
481824.20151028.2.1.mhd	1
481862.20151027.2.1.mhd	1
481926.20151028.2.1.mhd	4
481991.20151029.6520.2.1.mhd	4
481993.20151028.2.1.mhd	4
481994.20151029.2.1.mhd	1
482033.20151030.2.1.mhd	1
482060.20151027.2.1.mhd	4
482114.20151025.2.1.mhd	1
482145.20151106.2.1.mhd	1
482271.20151009.2.1.mhd	6
482296.20151019.2.1.mhd	1
482302.20151028.2.1.mhd	4
482329.20151031.2.1.mhd	1
482338.20151104.2.1.mhd	4
482615.20151012.2.1.mhd	1
482639.20151108.2.1.mhd	1
482705.20151107.2.1.mhd	1
482799.20151108.2.1.mhd	1
482832.20151105.2.1.mhd	1
482870.20151108.2.1.mhd	2
482906.20151104.2.1.mhd	1
482909.20151110.2.1.mhd	4
482914.20151106.2.1.mhd	1
482915.20151107.2.1.mhd	1
483033.20151115.2.1.mhd	1
483093.20151113.2.1.mhd	2
483158.20151022.2.1.mhd	5
483158.20151023.2.1.mhd	5
483286.20151130.2.1.mhd	1
483476.20151115.2.1.mhd	2
483500.20151116.2.1.mhd	6
483547.20151119.2.1.mhd	1
483613.20151114.2.1.mhd	4
483660.20151109.2.1.mhd	6
483671.20151031.2.1.mhd	4
483725.20151120.2.1.mhd	1
483884.20151121.2.1.mhd	1
484040.20151125.2.1.mhd	1
484051.20151115.2.1.mhd	4
484059.20151115.2.1.mhd	2
484121.20151122.2.1.mhd	1
484192.20151119.2.1.mhd	4
484206.20151122.2.1.mhd	4
484223.20151120.2.1.mhd	1
484251.20151125.2.1.mhd	4
484337.20151126.2.1.mhd	6
484440.20151129.2.1.mhd	1
484443.20151126.2.1.mhd	1
484519.20151126.2.1.mhd	1
484572.20151123.2.1.mhd	4
484666.20151127.2.1.mhd	4
484670.20151126.2.1.mhd	6
484676.20151201.2.1.mhd	4
484709.20151130.2.1.mhd	1
484727.20151127.2.1.mhd	4
484808.20151130.2.1.mhd	4
484813.20151130.2.1.mhd	6
484855.20151202.2.1.mhd	1
484890.20151203.2.1.mhd	1
485022.20151206.2.1.mhd	4
485033.20151210.2.1.mhd	2
485057.20151203.2.1.mhd	1
485060.20151204.2.1.mhd	4
485107.20151205.2.1.mhd	4
485175.20151205.2.1.mhd	6
485264.20151128.2.1.mhd	1
485278.20151206.2.1.mhd	6
485302.20151204.2.1.mhd	4
485366.20151206.2.1.mhd	1
485411.20151208.2.1.mhd	6
485427.20151204.2.1.mhd	3
485655.20151208.2.1.mhd	1
485742.20151216.2.1.mhd	4
485847.20151219.2.1.mhd	3
485947.20151220.4.1.mhd	1
485967.20151215.2.1.mhd	1
486047.20151219.2.1.mhd	4
486049.20151220.2.1.mhd	3
486095.20151220.2.1.mhd	4
486096.20151223.2.1.mhd	4
486129.20151219.2.1.mhd	6
486150.20151222.2.1.mhd	2
486219.20151219.2.1.mhd	6
486240.20151221.2.1.mhd	1
486266.20151212.2.1.mhd	4
486298.20160116.2.1.mhd	2
486302.20151217.2.1.mhd	6
486317.20151221.2.1.mhd	1
486426.20151225.2.1.mhd	4
486496.20151222.2.1.mhd	1
486523.20151223.2.1.mhd	2
486661.20151226.2.1.mhd	4
486699.20160102.2.1.mhd	1
486730.20151227.2.1.mhd	1
486770.20161007.2.1.mhd	4
486777.20160102.2.1.mhd	2
486823.20151226.2.1.mhd	4
486936.20151230.2.1.mhd	4
487022.20160110.2.1.mhd	1
487026.20151227.2.1.mhd	4
487043.20150809.2.1.mhd	4
487105.20151224.2.1.mhd	1
487121.20151227.2.1.mhd	4
487189.20160106.2.1.mhd	1
487293.20160110.2.1.mhd	4
487352.20160102.2.1.mhd	1
487436.20160101.2.1.mhd	4
487439.20160107.2.1.mhd	4
487583.20160107.2.1.mhd	1
487743.20160109.2.1.mhd	1
487747.20160109.2.1.mhd	6
487811.20160107.2.1.mhd	4
487895.20160118.2.1.mhd	1
487925.20160106.2.1.mhd	1
488079.20160111.2.1.mhd	4
488097.20160115.2.1.mhd	1
488132.20160130.2.1.mhd	4
488136.20160201.2.1.mhd	1
488185.20160118.2.1.mhd	4
488235.20160113.2.1.mhd	6
488375.20151127.2.1.mhd	2
488410.20160117.2.1.mhd	1
488411.20160116.2.1.mhd	4
488498.20160123.2.1.mhd	4
488502.20160105.2.1.mhd	4
488586.20160120.2.1.mhd	6
488616.20160119.2.1.mhd	1
488629.20160120.2.1.mhd	1
488630.20160122.2.1.mhd	4
488772.20160121.2.1.mhd	1
488900.20160125.2.1.mhd	1
488901.20160108.2.1.mhd	2
488911.20160123.2.1.mhd	1
489050.20170728.2.1.mhd	6
489055.20160123.2.1.mhd	1
489214.20160126.2.1.mhd	1
489261.20160127.2.1.mhd	1
489294.20160201.2.1.mhd	4
489327.20160208.2.1.mhd	1
489330.20160205.2.1.mhd	4
489332.20160208.2.1.mhd	6
489359.20160131.2.1.mhd	1
489391.20160131.2.1.mhd	4
489400.20160205.2.1.mhd	1
489411.20160214.2.1.mhd	4
489435.20160205.2.1.mhd	4
489437.20160206.2.1.mhd	1
489441.20160207.2.1.mhd	1
489442.20160211.2.1.mhd	1
489446.20160208.2.1.mhd	1
489466.20160128.2.1.mhd	2
489472.20160131.2.1.mhd	5
489498.20160131.2.1.mhd	1
489508.20160131.2.1.mhd	1
489557.20160128.2.1.mhd	1
489610.20160201.2.1.mhd	1
489655.20160202.2.1.mhd	1
489663.20160203.2.1.mhd	1
489666.20160205.2.1.mhd	1
489669.20160205.2.1.mhd	1
489672.20160209.2.1.mhd	1
489703.20160202.2.1.mhd	1
489722.20160209.2.1.mhd	2
489730.20160211.2.1.mhd	4
489733.20160212.2.1.mhd	4
489753.20160210.2.1.mhd	1
489754.20160210.2.1.mhd	4
489854.20160206.2.1.mhd	4
489859.20160209.2.1.mhd	4
489872.20160210.2.1.mhd	4
489885.20160212.2.1.mhd	1
490044.20160218.2.1.mhd	4
490053.20160212.2.1.mhd	1
490085.20160208.2.1.mhd	4
490169.20160217.2.1.mhd	1
490306.20160217.2.1.mhd	1
490308.20160215.2.1.mhd	4
490314.20160216.2.1.mhd	4
490424.20160220.2.1.mhd	4
490449.20160223.2.1.mhd	1
490528.20160221.2.1.mhd	1
490536.20160222.2.1.mhd	1
490538.20160218.2.1.mhd	5
490554.20160216.2.1.mhd	4
490558.20160216.2.1.mhd	4
490680.20160206.2.1.mhd	2
490707.20160220.2.1.mhd	1
490826.20160229.2.1.mhd	1
490851.20160223.2.1.mhd	1
490920.20160306.2.1.mhd	1
490969.20160224.2.1.mhd	6
490993.20160225.2.1.mhd	4
492103.20160226.2.1.mhd	4
492179.20160219.2.1.mhd	4
492258.20151228.2.1.mhd	2
492348.20160301.2.1.mhd	1
492363.20160308.2.1.mhd	6
492420.20160228.2.1.mhd	4
492425.20160228.2.1.mhd	1
492439.20160316.2.1.mhd	4
492577.20160307.2.1.mhd	6
492590.20160305.2.1.mhd	4
492618.20160304.2.1.mhd	3
492803.20160229.2.1.mhd	4
492813.20150709.2.1.mhd	1
492831.20160307.2.1.mhd	1
492881.20160312.2.1.mhd	4
492966.20160308.2.1.mhd	3
493027.20160309.2.1.mhd	4
493055.20160310.2.1.mhd	2
493068.20160304.2.1.mhd	4
493166.20160307.2.1.mhd	4
493207.20160309.2.1.mhd	1
493233.20160314.2.1.mhd	1
493250.20160312.2.1.mhd	4
493271.20160312.2.1.mhd	1
493324.20160314.2.1.mhd	1
493342.20160309.2.1.mhd	4
493363.20160313.2.1.mhd	4
493452.20160313.2.1.mhd	1
493456.20160313.2.1.mhd	4
493465.20160219.2.1.mhd	2
493526.20160315.2.1.mhd	1
493527.20160317.2.1.mhd	4
493650.20160308.2.1.mhd	4
493652.20160314.2.1.mhd	5
493805.20160314.2.1.mhd	4
493870.20160320.2.1.mhd	4
493898.20160330.2.1.mhd	6
493945.20160319.2.1.mhd	1
494019.20160319.2.1.mhd	4
494023.20160319.2.1.mhd	4
494103.20160321.2.1.mhd	4
494123.20160318.3.1.mhd	3
494126.20160319.2.1.mhd	4
494161.20160321.2.1.mhd	6
494195.20160329.2.1.mhd	2
494260.20160321.2.1.mhd	1
494265.20160826.2.1.mhd	1
494275.20160329..936.33126.2.1.mhd	5
494309.20160319.2.1.mhd	1
494333.20160323.2.1.mhd	1
494365.20160311.2.1.mhd	4
494366.20160322.2.1.mhd	1
494425.20160325.3.1.mhd	6
494448.20160326.2.1.mhd	1
494533.20160328.2.1.mhd	1
494534.20160325.2.1.mhd	4
494558.20160326.2.1.mhd	1
494628.20160401.2.1.mhd	4
494631.20160405.2.1.mhd	4
494668.20160327.2.1.mhd	6
494682.20160331.2.1.mhd	1
494689.20160402.2.1.mhd	1
494701.20160326.2.1.mhd	2
494702.20160326.2.1.mhd	4
494810.20160325.2.1.mhd	4
494811.20160326.2.1.mhd	3
494842.20160328.2.1.mhd	4
494975.20160401.2.1.mhd	1
494997.20160328.2.1.mhd	4
495022.20160329.2.1.mhd	1
495122.20160401.2.1.mhd	1
495139.20160402.2.1.mhd	1
495203.20160403.2.1.mhd	1
495236.20160401.2.1.mhd	4
495274.20160328.2.1.mhd	3
495315.20160408.2.1.mhd	1
495320.20160410.2.1.mhd	2
495341.20160413.2.1.mhd	1
495464.20160403.2.1.mhd	1
495499.20160327.2.1.mhd	3
495655.20160405.2.1.mhd	1
495671.20160407.2.1.mhd	4
495680.20160411.2.1.mhd	4
495683.20160411.2.1.mhd	4
495684.20160411.2.1.mhd	4
495802.20160411.2.1.mhd	1
495815.20160404.2.1.mhd	4
495834.20160409.2.1.mhd	4
495885.20160413.2.1.mhd	6
495926.20160425.2.1.mhd	4
495957.20160411.2.1.mhd	4
496003.20160412.2.1.mhd	4
496038.20160414.2.1.mhd	1
496072.20160413.2.1.mhd	4
496130.20160414.2.1.mhd	1
496217.20160416.2.1.mhd	1
496289.20160418.2.1.mhd	3
496297.20160418.2.1.mhd	4
496324.20160421.2.1.mhd	1
496388.20160419.2.1.mhd	4
496441.20160310.2.1.mhd	1
496641.20160419.2.1.mhd	1
496646.20160421.2.1.mhd	4
496679.20160421.2.1.mhd	1
496850.20160331.2.1.mhd	1
496887.20160422.2.1.mhd	1
496896.20160403.2.1.mhd	4
496899.20160425.2.1.mhd	4
496956.20160422.2.1.mhd	1
497034.20160504.2.1.mhd	1
497041.20160504.2.1.mhd	1
497103.20160424.2.1.mhd	4
497127.20160423.3.1.mhd	4
497195.20160430.2.1.mhd	1
497222.20160428.2.1.mhd	1
497303.20160425.2.1.mhd	1
497320.20160427.2.1.mhd	1
497359.20160427.2.1.mhd	1
497385.20160503.2.1.mhd	4
497396.20160507.2.1.mhd	2
497433.20160427.2.1.mhd	6
497473.20160430.2.1.mhd	4
497523.20160501.2.1.mhd	6
497616.20160506.2.1.mhd	1
497645.20160509.2.1.mhd	4
497810.20160511.2.1.mhd	2
497840.20160504.2.1.mhd	1
497935.20160511.2.1.mhd	1
497944.20160509.2.1.mhd	4
498088.20160506.2.1.mhd	1
498093.20160508.2.1.mhd	1
498160.20160509.2.1.mhd	1
498311.20160510.2.1.mhd	1
498358.20160513.2.1.mhd	1
498397.20160515.2.1.mhd	1
498565.20160515.2.1.mhd	6
498570.20160515.2.1.mhd	2
498644.20160518.2.1.mhd	1
498676.20160524.2.1.mhd	5
498703.20160515.2.1.mhd	1
498707.20160514.2.1.mhd	4
498733.20160514.2.1.mhd	1
498760.20160510.2.1.mhd	3
498885.20160528.2.1.mhd	1
498900.20160604.2.1.mhd	4
498939.20160518.2.1.mhd	4
498954.20160512.2.1.mhd	4
498986.20160519.2.1.mhd	1
499045.20160531.2.1.mhd	4
499046.20160611.2.1.mhd	6
499047.20160520.2.1.mhd	4
499075.20160520.2.1.mhd	4
499090.20160510.2.1.mhd	1
499223.20160519.2.1.mhd	6
499303.20160522.2.1.mhd	1
499359.20160525.2.1.mhd	2
499396.20160520.2.1.mhd	4
499661.20160525.2.1.mhd	1
499851.20160527.2.1.mhd	2
499872.20160529.2.1.mhd	6
499895.20160604.2.1.mhd	6
499976.20160531.2.1.mhd	6
500105.20160530.2.1.mhd	4
500156.20160528.2.1.mhd	1
500170.20161029.3.1.mhd	6
500194.20160605.2.1.mhd	1
500222.20160601.2.1.mhd	6
500279.20160524.2.1.mhd	1
500381.20160607.2.1.mhd	1
500405.20160603.2.1.mhd	1
500456.20160605.2.1.mhd	1
500503.20160604.2.1.mhd	4
500571.20160513.2.1.mhd	1
500577.20160603.2.1.mhd	5
500606.20160607.2.1.mhd	1
500607.20160609.2.1.mhd	4
500609.20160531.2.1.mhd	4
500627.20160613.2.1.mhd	1
500675.20160606.2.1.mhd	1
500745.20160612.2.1.mhd	1
500814.20160606.2.1.mhd	1
500851.20160610.2.1.mhd	1
500895.20160613.2.1.mhd	1
500921.20160612.2.1.mhd	1
500941.20160612.2.1.mhd	1
500957.20160610.2.1.mhd	1
500980.20160601.2.1.mhd	1
501235.20160615.2.1.mhd	1
501249.20160615.2.1.mhd	1
501390.20160614.2.1.mhd	1
501391.20160615.2.1.mhd	1
501432.20160619.2.1.mhd	1
501438.20160606.2.1.mhd	4
501517.20160618.2.1.mhd	6
501572.20160616.2.1.mhd	1
501607.20160618.2.1.mhd	1
501638.20180209.2.1.mhd	1
501660.20160616.2.1.mhd	4
501687.20160623.2.1.mhd	1
501746.20160622.2.1.mhd	1
501834.20160623.2.1.mhd	1
501993.20160624.2.1.mhd	1
502001.20160624.2.1.mhd	4
502122.20160624.2.1.mhd	1
502248.20160704.2.1.mhd	2
502391.20160626.2.1.mhd	4
502440.20160628.2.1.mhd	1
502614.20160629.2.1.mhd	6
502655.20160630.2.1.mhd	1
502666.20160702.2.1.mhd	2
502725.20160627.2.1.mhd	4
502728.20160701.2.1.mhd	4
502729.20160702.2.1.mhd	4
502805.20160701.2.1.mhd	4
502856.20160702.2.1.mhd	4
502861.20160706.2.1.mhd	1
502988.20160705.2.1.mhd	1
503024.20160702.2.1.mhd	4
503034.20160707.2.1.mhd	4
503101.20160705.2.1.mhd	1
503171.20160712.2.1.mhd	2
503216.20160708.2.1.mhd	6
503279.20160709.2.1.mhd	4
503288.20160710.2.1.mhd	1
503305.20160706.2.1.mhd	1
503313.20160708.2.1.mhd	1
503587.20160713.2.1.mhd	1
503613.20160711.2.1.mhd	4
503746.20160714.2.1.mhd	1
503805.20160708.2.1.mhd	4
503886.20160714.2.1.mhd	4
503888.20160715.2.1.mhd	4
503942.20160718.2.1.mhd	1
503981.20160716.2.1.mhd	4
504024.20160716.2.1.mhd	4
504054.20160716.2.1.mhd	6
504073.20160717.2.1.mhd	4
504143.20160721.2.1.mhd	4
504227.20160721.2.1.mhd	6
504316.20160718.2.1.mhd	4
504344.20160719.2.1.mhd	1
504351.20160719.2.1.mhd	4
504417.20161203.2.1.mhd	1
504465.20160711.2.1.mhd	5
504536.20160724.2.1.mhd	6
504553.20160718.2.1.mhd	4
504563.20160722.2.1.mhd	4
504571.20160721.2.1.mhd	1
504592.20160725.2.1.mhd	2
504653.20160723.2.1.mhd	3
504714.20160727.2.1.mhd	4
504749.20160731.2.1.mhd	1
504764.20160725.2.1.mhd	6
504774.20160726.2.1.mhd	1
504819.20160803.2.1.mhd	4
504853.20160726.2.1.mhd	4
505019.20160729.2.1.mhd	6
505133.20160728.2.1.mhd	1
505288.20160729.2.1.mhd	4
505323.20160801.2.1.mhd	4
505334.20160730.2.1.mhd	6
505344.20160801.2.1.mhd	4
505362.20160730.2.1.mhd	4
505387.20160807.2.1.mhd	4
505438.20160730.2.1.mhd	6
505440.20160801.2.1.mhd	4
505490.20160806.2.1.mhd	1
505519.20160803.2.1.mhd	1
505542.20160806.2.1.mhd	6
505543.20160730.2.1.mhd	4
505565.20160801.2.1.mhd	1
505739.20160804.2.1.mhd	6
505789.20160808.2.1.mhd	4
505797.20160807.2.1.mhd	4
505944.20160810.2.1.mhd	1
505992.20160815.2.1.mhd	1
506021.20160810.2.1.mhd	4
506044.20160817.2.1.mhd	4
506155.20160806.2.1.mhd	1
506221.20160810.2.1.mhd	1
506291.20160811.2.1.mhd	4
506305.20160813.2.1.mhd	1
506364.20160812.2.1.mhd	4
506560.20160817.2.1.mhd	2
506682.20160817.2.1.mhd	1
506747.20160821.2.1.mhd	1
506775.20160603.2.1.mhd	6
506798.20160228.2.1.mhd	1
506873.20160821.2.1.mhd	1
506930.20160820.2.1.mhd	5
506936.20160824.2.1.mhd	1
506997.20160823.2.1.mhd	2
507013.20160820.2.1.mhd	4
507014.20160820.2.1.mhd	4
507063.20160820.2.1.mhd	1
507104.20160820.2.1.mhd	4
507164.20160818.2.1.mhd	3
507215.20160823.2.1.mhd	1
507281.20160820.2.1.mhd	4
507406.20160826.2.1.mhd	1
507407.20160825.2.1.mhd	1
507412.20160828.2.1.mhd	4
507420.20160829.2.1.mhd	2
507491.20160827.2.1.mhd	1
507620.20160819.2.1.mhd	4
507658.20160830.2.1.mhd	1
507670.20160828.2.1.mhd	4
507694.20160830.2.1.mhd	1
507741.20160830.2.1.mhd	1
507784.20160828.2.1.mhd	4
507864.20160827.2.1.mhd	6
507896.20160902.2.1.mhd	1
507898.20160902.2.1.mhd	1
507961.20160831.2.1.mhd	1
508077.20160919.3.1.mhd	1
508337.20160919.2.1.mhd	1
508338.20160921.2.1.mhd	1
508385.20160918.2.1.mhd	1
508426.20160928.2.1.mhd	1
508435.20160930.2.1.mhd	6
508436.20161001.2.1.mhd	6
508438.20161002.2.1.mhd	1
508439.20160928.2.1.mhd	1
508440.20161003.2.1.mhd	6
508482.20160919.2.1.mhd	4
508576.20160612.2.1.mhd	3
508603.20160920.2.1.mhd	4
508661.20160921.2.1.mhd	1
508689.20160921.2.1.mhd	4
508727.20160922.2.1.mhd	1
508763.20160920.2.1.mhd	1
508769.20160921.2.1.mhd	1
508771.20160922.2.1.mhd	2
508908.20160923.2.1.mhd	4
508915.20160926.2.1.mhd	1
508938.20160930.2.1.mhd	6
508943.20160929.2.1.mhd	1
508944.20160929.2.1.mhd	6
509070.20160902.2.1.mhd	1
509144.20160914.2.1.mhd	1
509161.20160906.2.1.mhd	4
509178.20160907.2.1.mhd	1
509291.20160909.2.1.mhd	6
509310.20160904.2.1.mhd	1
509313.20160902.2.1.mhd	4
509368.20160916.2.1.mhd	1
509371.20160915.2.1.mhd	6
509376.20160925.2.1.mhd	4
509473.20160921.2.1.mhd	6
509487.20160909.2.1.mhd	6
509537.20160907.2.1.mhd	4
509582.20160910.2.1.mhd	4
509605.20160907.2.1.mhd	1
509691.20160915.2.1.mhd	1
509692.20160912.2.1.mhd	4
509702.20160908.2.1.mhd	1
509720.20160911.2.1.mhd	2
509750.20160916.2.1.mhd	4
509791.20160914.2.1.mhd	4
509805.20160910.2.1.mhd	1
509820.20160910.2.1.mhd	4
509873.20160912.2.1.mhd	4
509874.20160912.2.1.mhd	4
509886.20160827.2.1.mhd	1
509887.20160917.2.1.mhd	4
509942.20160927.2.1.mhd	1
510042.20161005.2.1.mhd	4
510088.20161001.2.1.mhd	6
510096.20161001.2.1.mhd	4
510156.20160929.2.1.mhd	4
510216.20161004.2.1.mhd	6
510219.20161003.2.1.mhd	1
510285.20160926.2.1.mhd	6
510310.20161006.2.1.mhd	1
510319.20161001.2.1.mhd	4
510362.20160912.2.1.mhd	1
510378.20160926.2.1.mhd	2
510411.20160928.2.1.mhd	6
510462.20161004.2.1.mhd	6
510556.20161006.2.1.mhd	2
510574.20161008.2.1.mhd	3
510579.20161013.2.1.mhd	1
510588.20161009.2.1.mhd	4
510614.20161007.2.1.mhd	1
510620.20161009.2.1.mhd	1
510646.20160920.2.1.mhd	2
510766.20161010.2.1.mhd	1
510773.20161008.2.1.mhd	1
510811.20161006.2.1.mhd	4
510919.20161011.2.1.mhd	3
510927.20161015.2.1.mhd	1
510974.20161011.2.1.mhd	4
510985.20161008.2.1.mhd	1
511028.20161016.2.1.mhd	2
511132.20161011.2.1.mhd	3
511156.20161011.2.1.mhd	1
511198.20161015.2.1.mhd	2
511218.20161015.2.1.mhd	6
511219.20161014.2.1.mhd	4
511277.20161017.2.1.mhd	1
511325.20161017.2.1.mhd	1
511424.20161022.2.1.mhd	1
511434.20161023.2.1.mhd	4
511490.20161019.2.1.mhd	3
511491.20161013.2.1.mhd	5
511536.20161019.2.1.mhd	1
511557.20161018.2.1.mhd	2
511683.20161022.2.1.mhd	4
511889.20161020.2.1.mhd	1
511895.20161021.2.1.mhd	1
511896.20161021.2.1.mhd	1
511918.20161020.2.1.mhd	1
511999.20161028.2.1.mhd	4
512026.20161027.2.1.mhd	6
512037.20161025.2.1.mhd	1
512044.20161027.2.1.mhd	1
512090.20161028.2.1.mhd	4
512173.20161028.2.1.mhd	1
512175.20161104.2.1.mhd	4
512181.20161025.2.1.mhd	1
512221.20161215.2.1.mhd	6
512223.20161030.2.1.mhd	1
512251.20161025.2.1.mhd	4
512401.20161028.2.1.mhd	4
512509.20161027.2.1.mhd	4
512526.20161103.2.1.mhd	4
512534.20161102.2.1.mhd	1
512715.20161031.2.1.mhd	4
512745.20161030.2.1.mhd	2
512790.20161124.2.1.mhd	4
512833.20161101.2.1.mhd	6
512853.20161102.2.1.mhd	1
512894.20161105.2.1.mhd	4
512941.20161109.2.1.mhd	1
512955.20161102.2.1.mhd	4
513003.20161102.2.1.mhd	1
513173.20161108.2.1.mhd	6
513209.20161106.2.1.mhd	1
513231.20161107.2.1.mhd	1
513235.20161028.2.1.mhd	4
513263.20161104.2.1.mhd	6
513276.20161107.2.1.mhd	1
513285.20161106.2.1.mhd	1
513292.20161108.2.1.mhd	4
513358.20161108.2.1.mhd	4
513370.20161109.2.1.mhd	4
513482.20161109.2.1.mhd	1
513489.20161110.2.1.mhd	1
513637.20161110.2.1.mhd	6
513655.20161110.2.1.mhd	5
513682.20161112.2.1.mhd	1
513754.20161109.2.1.mhd	2
513819.20161108.2.1.mhd	4
513884.20161114.2.1.mhd	6
513951.20161115.2.1.mhd	4
514013.20161112.2.1.mhd	4
514022.20161116.2.1.mhd	4
514026.20161108.2.1.mhd	4
514077.20161117.2.1.mhd	1
514279.20161122.2.1.mhd	1
514386.20161119.2.1.mhd	1
514493.20161121.2.1.mhd	4
514495.20161121.2.1.mhd	4
514563.20161121.2.1.mhd	4
514596.20161123.3.1.mhd	1
514600.20161117.2.1.mhd	4
514609.20161122.2.1.mhd	1
514611.20161111.2.1.mhd	6
514672.20161127.2.1.mhd	1
514786.20161127.2.1.mhd	4
514884.20161127.2.1.mhd	3
514887.20161123.2.1.mhd	4
514952.20161125.2.1.mhd	4
514973.20161126.2.1.mhd	4
514992.20161127.2.1.mhd	1
515022.20161127.2.1.mhd	4
515106.20161126.2.1.mhd	1
515129.20161127.2.1.mhd	1
515165.20161207.2.1.mhd	4
515186.20161209.2.1.mhd	1
515243.20161204.2.1.mhd	1
515301.20161129.2.1.mhd	1
515338.20161208.2.1.mhd	1
515348.20161125.2.1.mhd	4
515457.20161130.2.1.mhd	1
515577.20161204.2.1.mhd	4
515658.20161205.2.1.mhd	1
515690.20161201.2.1.mhd	1
515761.20161206.2.1.mhd	4
515909.20161207.2.1.mhd	1
515935.20161208.2.1.mhd	1
515963.20170222.2.1.mhd	1
515984.20161210.2.1.mhd	4
516005.20161209.2.1.mhd	1
516116.20161210.2.1.mhd	4
516126.20161211.2.1.mhd	1
516144.20161212.2.1.mhd	1
516248.20161210.2.1.mhd	4
516252.20161213.2.1.mhd	1
516323.20161214.2.1.mhd	1
516335.20161214.2.1.mhd	1
516337.20161214.2.1.mhd	1
516406.20161212.2.1.mhd	4
516464.20161214.2.1.mhd	4
516486.20161215.2.1.mhd	4
516524.20161216.2.1.mhd	1
516569.20161216.2.1.mhd	1
516593.20161217.2.1.mhd	4
516596.20161217.2.1.mhd	1
516732.20161220.2.1.mhd	4
516812.20161219.2.1.mhd	4
516823.20161218.2.1.mhd	4
516846.20161216.2.1.mhd	4
516881.20161220.2.1.mhd	1
516983.20161221.2.1.mhd	1
517043.20161221.2.1.mhd	1
517045.20161221.2.1.mhd	1
517047.20161219.2.1.mhd	2
517056.20161215.2.1.mhd	3
517152.20161222.2.1.mhd	4
517163.20161219.3.1.mhd	4
517341.20170102.2.1.mhd	4
517347.20161225.2.1.mhd	1
517360.20161216.2.1.mhd	4
517368.20161223.2.1.mhd	1
517452.20161226.2.1.mhd	1
517462.20161226.2.1.mhd	1
517474.20161226.2.1.mhd	5
517590.20161228.2.1.mhd	2
517591.20161225.2.1.mhd	1
517676.20161222.2.1.mhd	6
517690.20161215.2.1.mhd	3
517717.20161229.2.1.mhd	1
517748.20161224.2.1.mhd	6
517783.20161230.2.1.mhd	4
517814.20161231.2.1.mhd	1
517822.20161231.2.1.mhd	1
517850.20170101.2.1.mhd	1
517856.20170102.2.1.mhd	4
517857.20170101.2.1.mhd	1
518000.20160920.2.1.mhd	5
518137.20170103.2.1.mhd	4
518449.20170106.2.1.mhd	1
518486.20170108.2.1.mhd	6
518548.20170108.2.1.mhd	4
518674.20170109.2.1.mhd	6
518684.20170109.2.1.mhd	4
518817.20170110.2.1.mhd	4
518832.20170110.2.1.mhd	6
518866.20170109.2.1.mhd	6
518883.20170112.2.1.mhd	1
518905.20170113.2.1.mhd	4
518979.20170112.2.1.mhd	1
519054.20170113.2.1.mhd	1
519063.20170115.2.1.mhd	1
519171.20170107.2.1.mhd	4
519265.20170114.2.1.mhd	1
519270.20170112.2.1.mhd	1
519393.20170117.2.1.mhd	6
519395.20170115.2.1.mhd	4
519419.20170112.2.1.mhd	4
519427.20170118.2.1.mhd	4
519505.20170119.2.1.mhd	4
519517.20170120.2.1.mhd	4
519524.20170118.2.1.mhd	4
519556.20170119.2.1.mhd	1
519599.20170119.2.1.mhd	1
519605.20170119.3.1.mhd	1
519654.20170122.2.1.mhd	1
519677.20170119.2.1.mhd	1
519715.20170121.2.1.mhd	6
519719.20170122.2.1.mhd	1
519795.20170121.2.1.mhd	6
519803.20170120.2.1.mhd	4
519812.20170122.2.1.mhd	1
519848.20170124.2.1.mhd	4
519854.20170122.2.1.mhd	6
519868.20170121.2.1.mhd	4
519880.20170123.2.1.mhd	4
519914.20170121.2.1.mhd	4
519915.20170124.2.1.mhd	4
520611.20170125.2.1.mhd	1
520617.20170126.2.1.mhd	4
520619.20170126.2.1.mhd	1
520620.20170126.2.1.mhd	6
520643.20170127.2.1.mhd	1
520644.20170127.2.1.mhd	1
520645.20170124.2.1.mhd	6
520672.20170128.2.1.mhd	1
520673.20170120.2.1.mhd	4
520694.20170127.2.1.mhd	4
520697.20170206.2.1.mhd	1
520725.20170129.2.1.mhd	4
520747.20170129.2.1.mhd	4
520844.20170201.2.1.mhd	1
520974.20170202.2.1.mhd	4
521005.20170202.2.1.mhd	4
521162.20170205.2.1.mhd	4
521170.20170128.2.1.mhd	4
521213.20170203.2.1.mhd	6
521356.20160828.2.1.mhd	3
521364.20170205.2.1.mhd	1
521367.20170203.2.1.mhd	4
521424.20170129.2.1.mhd	2
521431.20170205.2.1.mhd	1
521517.20170131.2.1.mhd	4
521523.20170205.2.1.mhd	6
521529.20170204.2.1.mhd	4
521542.20170205.2.1.mhd	4
521551.20170131.2.1.mhd	6
521652.20170201.2.1.mhd	4
521655.20170207.2.1.mhd	4
521855.20170209.2.1.mhd	4
521856.20170209.2.1.mhd	1
521878.20170203.2.1.mhd	1
521968.20170212.2.1.mhd	6
522058.20170814.2.1.mhd	4
522060.20170211.2.1.mhd	4
522063.20170210.2.1.mhd	4
522122.20170213.2.1.mhd	4
522214.20170213.2.1.mhd	1
522295.20170214.2.1.mhd	1
522306.20170213.2.1.mhd	4
522417.20170215.2.1.mhd	2
522420.20170215.2.1.mhd	6
522480.20170216.2.1.mhd	1
522524.20170212.2.1.mhd	4
522534.20170217.2.1.mhd	1
522567.20170214.2.1.mhd	6
522584.20170218.2.1.mhd	1
522708.20170216.2.1.mhd	1
522860.20170220.2.1.mhd	6
522864.20170216.2.1.mhd	4
522972.20170218.2.1.mhd	4
522975.20170206.2.1.mhd	2
523074.20170221.2.1.mhd	1
523098.20170223.2.1.mhd	4
523142.20170220.2.1.mhd	1
523152.20170214.2.1.mhd	1
523193.20170223.2.1.mhd	1
523200.20170223.2.1.mhd	1
523263.20170225.2.1.mhd	1
523264.20170223.2.1.mhd	1
523273.20170226.2.1.mhd	6
523418.20170118.2.1.mhd	1
523421.20170226.2.1.mhd	1
523509.20170228.3.1.mhd	1
523518.20170226.2.1.mhd	1
523544.20170225.2.1.mhd	4
523617.20170228.2.1.mhd	4
523648.20170227.2.1.mhd	1
523687.20170225.2.1.mhd	1
523768.20170228.2.1.mhd	1
523941.20170303.2.1.mhd	1
524051.20170306.2.1.mhd	4
524148.20170306.2.1.mhd	1
524200.20170305.2.1.mhd	4
524218.20170220.2.1.mhd	4
524235.20170306.2.1.mhd	1
524373.20170322.2.1.mhd	1
524467.20170307.2.1.mhd	4
524609.20170306.2.1.mhd	1
524671.20170310.2.1.mhd	1
524699.20171109.2.1.mhd	4
524705.20170312.2.1.mhd	2
524787.20170310.2.1.mhd	1
524806.20170310.2.1.mhd	4
524866.20170309.2.1.mhd	5
524881.20170311.2.1.mhd	1
524934.20170313.2.1.mhd	1
525135.20170315.2.1.mhd	4
525140.20170315.2.1.mhd	4
525273.20170310.2.1.mhd	2
525366.20170317.2.1.mhd	1
525387.20170318.2.1.mhd	1
525472.20170318.2.1.mhd	1
525482.20170317.2.1.mhd	4
525582.20170321.2.1.mhd	4
525583.20170310.2.1.mhd	6
525593.20170321.2.1.mhd	4
525603.20170320.2.1.mhd	4
525718.20170321.2.1.mhd	1
525929.20170323.2.1.mhd	3
525933.20170323.2.1.mhd	1
525935.20170322.2.1.mhd	1
525958.20170327.2.1.mhd	1
526003.20170324.4.1.mhd	1
526008.20170325.2.1.mhd	1
526017.20170324.2.1.mhd	1
526092.20170327.2.1.mhd	6
526097.20170326.2.1.mhd	4
526285.20170326.2.1.mhd	1
526293.20170326.2.1.mhd	4
526526.20170330.2.1.mhd	1
526583.20170330.2.1.mhd	1
526649.20170330.2.1.mhd	4
526671.20170331.2.1.mhd	6
526781.20170331.2.1.mhd	1
526806.20170401.2.1.mhd	1
526822.20170402.2.1.mhd	1
526823.20170401.2.1.mhd	1
526846.20170402.2.1.mhd	1
526922.20170404.2.1.mhd	1
527020.20170405.2.1.mhd	1
527058.20170406.2.1.mhd	1
527083.20170405.2.1.mhd	1
527098.20170405.2.1.mhd	4
527108.20170404.2.1.mhd	4
527181.20170406.2.1.mhd	6
527243.20170402.2.1.mhd	1
527341.20170407.2.1.mhd	1
527362.20170407.2.1.mhd	1
527483.20170409.2.1.mhd	1
527488.20170409.2.1.mhd	1
527778.20170410.2.1.mhd	4
527798.20170411.2.1.mhd	1
527890.20170413.2.1.mhd	1
527920.20170413.2.1.mhd	4
527975.20170420.2.1.mhd	2
527984.20170413.2.1.mhd	4
528043.20170414.3.1.mhd	1
528130.20170414.2.1.mhd	1
528153.20170415.2.1.mhd	1
528244.20170415.2.1.mhd	1
528316.20170424.2.1.mhd	4
528354.20170416.2.1.mhd	1
528381.20170416.2.1.mhd	4
528495.20170416.2.1.mhd	4
528496.20170418.2.1.mhd	1
528642.20170419.2.1.mhd	1
528703.20170420.2.1.mhd	5
528776.20170421.2.1.mhd	2
528830.20170421.2.1.mhd	4
528903.20170425.2.1.mhd	1
528989.20170426.2.1.mhd	1
529117.20170425.2.1.mhd	1
529141.20170421.2.1.mhd	2
529142.20170423.2.1.mhd	3
529276.20170426.2.1.mhd	1
529297.20170428.2.1.mhd	2
529455.20170424.2.1.mhd	4
529581.20170428.2.1.mhd	1
529646.20170429.2.1.mhd	1
529712.20170430.2.1.mhd	1
529818.20170426.2.1.mhd	2
529841.20170430.2.1.mhd	1
530053.20170508.2.1.mhd	4
530095.20170503.2.1.mhd	1
530182.20170504.2.1.mhd	6
530186.20170503.2.1.mhd	1
530443.20170503.2.1.mhd	2
530556.20170507.2.1.mhd	6
530589.20170506.2.1.mhd	6
530667.20170508.2.1.mhd	1
530745.20170507.2.1.mhd	4
530776.20170508.2.1.mhd	4
530814.20170509.2.1.mhd	1
530867.20170509.2.1.mhd	1
530872.20170503.3.1.mhd	4
530884.20170510.2.1.mhd	4
531018.20170511.2.1.mhd	4
531130.20170511.2.1.mhd	1
531191.20170512.2.1.mhd	1
531294.20170505.2.1.mhd	4
531312.20170515.2.1.mhd	1
531441.20170515.2.1.mhd	1
531582.20170514.2.1.mhd	4
531595.20170516.2.1.mhd	4
531614.20170517.2.1.mhd	6
531906.20170520.2.1.mhd	1
531915.20170520.2.1.mhd	6
531922.20170520.2.1.mhd	1
532003.20170519.2.1.mhd	4
532013.20170521.2.1.mhd	1
532016.20170519.2.1.mhd	6
532089.20170523.2.1.mhd	1
533139.20170523.2.1.mhd	4
533257.20170525.2.1.mhd	4
533262.20170525.2.1.mhd	3
533271.20170525.2.1.mhd	1
533429.20170527.2.1.mhd	1
533501.20170527.2.1.mhd	6
533525.20170527.2.1.mhd	1
533526.20170529.2.1.mhd	6
533538.20170529.2.1.mhd	1
533627.20170529.2.1.mhd	6
533716.20170521.2.1.mhd	2
533995.20170603.2.1.mhd	1
533998.20170602.2.1.mhd	1
534014.20170602.2.1.mhd	1
534092.20170604.2.1.mhd	1
534104.20170529.2.1.mhd	4
534130.20170605.2.1.mhd	1
534161.20170531.2.1.mhd	6
534196.20170603.2.1.mhd	1
534231.20170605.2.1.mhd	6
534389.20170607.2.1.mhd	1
534480.20170608.2.1.mhd	1
534503.20170607.2.1.mhd	4
534546.20170607.2.1.mhd	3
534685.20170610.2.1.mhd	4
534693.20170610.2.1.mhd	1
534786.20170614.2.1.mhd	5
534805.20170510.3.1.mhd	2
534898.20170613.2.1.mhd	4
534992.20170611.2.1.mhd	1
535071.20170607.2.1.mhd	4
535116.20170627.2.1.mhd	2
535132.20170620.2.1.mhd	5
535282.20170406.2.1.mhd	5
535333.20170618.2.1.mhd	1
535426.20170619.2.1.mhd	1
535427.20170617.3.1.mhd	4
535555.20170614.2.1.mhd	4
535565.20170617.2.1.mhd	4
535644.20170324.2.1.mhd	2
535656.20170621.2.1.mhd	1
535724.20170621.2.1.mhd	4
535779.20170622.2.1.mhd	1
535936.20170623.2.1.mhd	1
535987.20170625.2.1.mhd	1
535989.20170624.8390.2.1.mhd	1
535993.20170625.2.1.mhd	4
536056.20170625.2.1.mhd	1
536058.20170625.2.1.mhd	1
536069.20170624.2.1.mhd	1
536081.20170623.2.1.mhd	4
536140.20170626.2.1.mhd	4
536206.20170626.2.1.mhd	1
536441.20170620.2.1.mhd	6
536551.20170630.2.1.mhd	1
536591.20170630.2.1.mhd	6
536621.20170701.2.1.mhd	1
536627.20170702.2.1.mhd	1
536629.20170702.2.1.mhd	1
536632.20170623.2.1.mhd	6
536701.20170702.2.1.mhd	1
536733.20170701.2.1.mhd	1
536796.20170703.2.1.mhd	1
536860.20170627.2.1.mhd	4
536968.20170627.2.1.mhd	4
537087.20170706.2.1.mhd	1
537176.20170707.2.1.mhd	1
537177.20170707.2.1.mhd	1
537335.20170708.3.21.mhd	1
537375.20170705.2.1.mhd	3
537628.20170708.2.1.mhd	4
537752.20170706.2.1.mhd	4
538009.20170717.2.1.mhd	1
538025.20170716.2.1.mhd	4
538146.20170717.2.1.mhd	1
538292.20170705.2.1.mhd	4
538322.20170705.2.1.mhd	3
538452.20170719.2.1.mhd	1
538472.20170720.2.1.mhd	6
538479.20170722.2.1.mhd	4
538503.20170721.2.1.mhd	1
538508.20170721.2.1.mhd	1
538522.20170720.2.1.mhd	1
538583.20170721.2.1.mhd	1
538606.20170723.2.1.mhd	1
538722.20170724.2.1.mhd	1
538723.20170724.2.1.mhd	1
538810.20170725.2.1.mhd	1
538854.20170723.2.1.mhd	6
538893.20170723.2.1.mhd	4
538954.20170726.2.1.mhd	1
538970.20170727.2.1.mhd	1
539060.20170727.2.1.mhd	1
539096.20170727.2.1.mhd	4
539244.20170728.2.1.mhd	4
539295.20170801.2.1.mhd	1
539295.20170802.2.1.mhd	1
539323.20170731.2.1.mhd	1
539431.20170731.2.1.mhd	1
539459.20170729.2.1.mhd	6
539488.20170729.2.1.mhd	2
539574.20170801.2.1.mhd	1
539587.20170731.3.1.mhd	6
539596.20170801.3.1.mhd	4
539700.20170802.2.1.mhd	4
539836.20170808.2.1.mhd	2
539840.20170803.2.1.mhd	4
539901.20170805.2.1.mhd	1
539983.20170806.2.1.mhd	6
540102.20170807.2.1.mhd	4
540112.20170807.2.1.mhd	1
540131.20170808.2.1.mhd	1
540403.20170808.2.1.mhd	1
540403.20170813.2.1.mhd	1
540439.20170811.2.1.mhd	1
540448.20170809.2.1.mhd	6
540449.20170810.2.1.mhd	1
540511.20170812.2.1.mhd	1
540566.20170810.3.1.mhd	1
540584.20170813.2.1.mhd	1
540596.20170815.2.1.mhd	4
540702.20170814.2.1.mhd	1
540836.20170816.2.1.mhd	6
540850.20170816.2.1.mhd	6
540855.20170818.2.1.mhd	4
540857.20170816.2.1.mhd	1
540858.20170815.2.1.mhd	4
540921.20170325.2.1.mhd	6
541075.20170817.2.1.mhd	1
541146.20170819.2.1.mhd	6
541148.20170819.2.1.mhd	1
541168.20170820.2.1.mhd	1
541338.20170821.2.1.mhd	1
541340.20170821.2.1.mhd	3
541360.20170819.2.1.mhd	4
541423.20170822.2.1.mhd	1
541579.20170824.2.1.mhd	4
541681.20170824.2.1.mhd	1
541682.20170824.2.1.mhd	1
541689.20170823.2.1.mhd	4
541707.20170824.3.1.mhd	1
541752.20170825.2.1.mhd	1
541769.20170827.2.1.mhd	6
541778.20170827.2.1.mhd	1
541833.20170828.2.1.mhd	6
541847.20170827.2.1.mhd	4
541884.20170823.2.1.mhd	2
542194.20170901.2.1.mhd	4
542196.20170830.3.1.mhd	6
542373.20170902.2.1.mhd	1
542382.20170903.2.1.mhd	4
542384.20170902.2.1.mhd	4
542391.20170903.2.1.mhd	1
542392.20170903.3.1.mhd	1
542498.20170902.2.1.mhd	4
542499.20170901.2.1.mhd	4
542504.20170903.2.1.mhd	4
542512.20170902.2.1.mhd	4
542536.20170903.2.1.mhd	6
542541.20170821.2.1.mhd	4
542679.20170906.2.1.mhd	4
542735.20170831.2.1.mhd	6
542756.20170905.2.1.mhd	1
542837.20170905.2.1.mhd	1
542955.20170903.2.1.mhd	4
542968.20170908.2.1.mhd	1
543053.20170909.2.1.mhd	1
543193.20170716.2.1.mhd	6
543249.20170911.2.1.mhd	4
543361.20170912.2.1.mhd	4
543363.20170911.2.1.mhd	6
543369.20170911.2.1.mhd	4
543481.20170914.2.1.mhd	1
543502.20170912.2.1.mhd	4
543509.20170913.2.1.mhd	4
543552.20170912.2.1.mhd	1
543612.20170914.2.1.mhd	1
543614.20170914.2.1.mhd	1
543624.20170915.2.1.mhd	1
543677.20170915.2.1.mhd	1
543703.20170916.2.1.mhd	1
543707.20170918.2.1.mhd	1
543720.20170916.2.1.mhd	1
543721.20170916.2.1.mhd	1
543736.20170918.2.1.mhd	4
543869.20170918.2.1.mhd	4
543880.20170916.2.1.mhd	1
543923.20170916.2.1.mhd	1
543938.20170918.2.1.mhd	4
544104.20170920.2.1.mhd	1
544157.20170919.2.1.mhd	1
544163.20170919.2.1.mhd	4
544165.20170919.2.1.mhd	6
544169.20170919.2.1.mhd	6
544224.20170918.2.1.mhd	4
544281.20170922.2.1.mhd	1
544342.20170922.2.1.mhd	1
544387.20170924.2.1.mhd	4
544437.20170925.2.1.mhd	1
544457.20170921.2.1.mhd	4
544462.20170922.2.1.mhd	6
544464.20170924.2.1.mhd	4
544572.20170925.2.1.mhd	1
544584.20170924.2.1.mhd	1
544589.20170926.2.1.mhd	6
544770.20170922.5.1.mhd	6
544780.20170927.2.1.mhd	4
544802.20180403.2.1.mhd	4
544845.20170928.2.1.mhd	1
544862.20170928.2.1.mhd	4
544913.20170930.2.1.mhd	6
544921.20171001.2.1.mhd	1
544964.20171016.2.1.mhd	6
544995.20171002.2.1.mhd	4
545014.20171006.2.1.mhd	1
545046.20171004.2.1.mhd	1
545049.20171005.6.1.mhd	1
545065.20171006.2.1.mhd	1
545098.20171006.2.1.mhd	1
545354.20171008.2.1.mhd	4
545436.20171009.2.1.mhd	1
545867.20171014.2.1.mhd	4
545881.20171014.2.1.mhd	6
546000.20171014.2.1.mhd	1
546003.20171015.2.1.mhd	5
546139.20171004.2.1.mhd	3
546239.20171016.2.1.mhd	1
546325.20171018.2.1.mhd	2
546363.20171019.2.1.mhd	4
546366.20171018.2.1.mhd	1
546418.20171018.2.1.mhd	1
546456.20171019.2.1.mhd	4
546519.20171020.2.1.mhd	6
546642.20171021.2.1.mhd	4
546972.20171025.2.1.mhd	1
546978.20171022.2.1.mhd	4
547101.20171026.2.1.mhd	1
547121.20171025.2.1.mhd	6
547200.20171029.2.1.mhd	1
547205.20171029.2.1.mhd	4
547208.20171030.2.1.mhd	4
547276.20171026.2.1.mhd	4
547356.20171028.2.1.mhd	1
547471.20171031.2.1.mhd	4
547517.20171031.2.1.mhd	4
547518.20171030.2.1.mhd	4
547521.20171030.2.1.mhd	1
547522.20171028.2.1.mhd	4
547553.20171101.2.1.mhd	1
547581.20171101.2.1.mhd	1
547623.20171102.2.1.mhd	4
547635.20171101.2.1.mhd	4
547704.20171102.2.1.mhd	4
547744.20171102.2.1.mhd	1
547746.20171102.2.1.mhd	1
547804.20171103.2.1.mhd	6
547827.20171102.2.1.mhd	1
547854.20171105.2.1.mhd	2
547926.20171106.2.1.mhd	1
547932.20171104.2.1.mhd	4
547965.20171104.2.1.mhd	4
548086.20171107.2.1.mhd	4
548186.20171109.2.1.mhd	6
548189.20171108.2.1.mhd	6
548305.20171108.2.1.mhd	4
548312.20171109.2.1.mhd	4
548446.20171107.2.1.mhd	4
548447.20171110.2.1.mhd	6
548457.20171110.2.1.mhd	4
548472.20171109.2.1.mhd	4
548515.20171110.2.1.mhd	1
548518.20171110.2.1.mhd	1
548617.20171110.2.1.mhd	4
548633.20171111.2.1.mhd	4
548733.20171106.2.1.mhd	4
548736.20171110.2.1.mhd	4
548850.20171114.2.1.mhd	4
548851.20171108.2.1.mhd	4
548984.20171115.3.1.mhd	4
548987.20171115.2.1.mhd	1
548990.20171116.2.1.mhd	1
549107.20171102.2.1.mhd	2
549145.20171117.3.1.mhd	2
549171.20171117.2.1.mhd	1
549174.20171118.2.1.mhd	1
549263.20171119.2.1.mhd	2
549279.20171106.2.1.mhd	4
549291.20171115.2.1.mhd	4
549334.20171118.2.1.mhd	1
549341.20171120.2.1.mhd	6
549412.20171119.2.1.mhd	4
549414.20171118.2.1.mhd	1
549609.20171122.2.1.mhd	4
549700.20171122.2.1.mhd	2
549710.20171122.2.1.mhd	6
549800.20171122.2.1.mhd	1
551013.20171124.2.1.mhd	4
551057.20171124.2.1.mhd	1
551072.20171124.2.1.mhd	1
551074.20171124.2.1.mhd	1
551079.20171125.2.1.mhd	1
551170.20171119.2.1.mhd	4
551178.20171122.2.1.mhd	4
551185.20171126.2.1.mhd	1
551449.20171130.2.1.mhd	4
551487.20171128.2.1.mhd	1
551520.20170511.2.1.mhd	3
551529.20171201.2.1.mhd	2
551659.20171130.2.1.mhd	4
551728.20171202.2.1.mhd	1
551737.20171201.2.1.mhd	6
551806.20171130.2.1.mhd	4
551834.20171203.2.1.mhd	1
551967.20171204.2.1.mhd	4
552048.20171205.2.1.mhd	1
552086.20171203.2.1.mhd	4
552087.20171205.2.1.mhd	4
552089.20171205.2.1.mhd	1
552090.20171205.2.1.mhd	1
552103.20171206.2.1.mhd	4
552175.20171206.2.1.mhd	2
552212.20171207.2.1.mhd	6
552238.20171206.2.1.mhd	1
552239.20171202.2.1.mhd	4
552242.20171129.2.1.mhd	4
552454.20171210.2.1.mhd	4
552525.20171208.2.1.mhd	6
552558.20171211.2.1.mhd	6
552618.20171211.2.1.mhd	4
552672.20171211.2.1.mhd	6
552687.20171202.2.1.mhd	4
552749.20171212.2.1.mhd	2
552752.20171206.2.1.mhd	1
552859.20171211.2.1.mhd	2
552879.20171211.2.1.mhd	4
552946.20171214.2.1.mhd	2
552957.20171213.2.1.mhd	1
553038.20171215.2.1.mhd	6
553050.20171204.2.1.mhd	4
553054.20171214.2.1.mhd	1
553109.20171201.2.1.mhd	1
553143.20171217.2.1.mhd	1
553217.20171217.2.1.mhd	1
553298.20171213.2.1.mhd	4
553299.20171214.2.1.mhd	4
553348.20171218.2.1.mhd	1
553350.20171214.2.1.mhd	4
553487.20171213.2.1.mhd	4
553494.20171219.2.1.mhd	4
553577.20171220.2.1.mhd	1
553578.20171221.2.1.mhd	4
553579.20171220.2.1.mhd	1
553584.20171215.2.1.mhd	6
553592.20171219.2.1.mhd	1
553595.20171220.2.1.mhd	1
553597.20171220.2.1.mhd	4
553638.20171221.2.1.mhd	6
553664.20171221.2.1.mhd	1
553700.20171222.2.1.mhd	1
553707.20171221.2.1.mhd	2
553768.20171224.2.1.mhd	4
553770.20171223.2.1.mhd	1
553779.20171223.2.1.mhd	1
553821.20171224.2.1.mhd	6
553825.20171224.2.1.mhd	4
553883.20171220.2.1.mhd	2
553981.20171225.2.1.mhd	2
554051.20171213.2.1.mhd	4
554067.20171225.2.1.mhd	1
554070.20171225.2.1.mhd	4
554077.20171225.2.1.mhd	1
554079.20171225.2.1.mhd	1
554132.20171226.2.1.mhd	6
554197.20171226.3.1.mhd	1
554204.20171223.2.1.mhd	4
554207.20171222.2.1.mhd	4
554218.20171225.2.1.mhd	6
554315.20171227.2.1.mhd	6
554361.20171229.2.1.mhd	4
554407.20171228.2.1.mhd	1
554419.20171229.2.1.mhd	1
554482.20171230.2.1.mhd	1
554502.20171230.2.1.mhd	1
554506.20171231.3.1.mhd	4
554550.20171231.2.1.mhd	1
554649.20171230.2.1.mhd	4
554755.20180102.2.1.mhd	6
554834.20171231.3.1.mhd	4
554840.20180102.2.1.mhd	1
554902.20180103.2.1.mhd	4
554945.20180110.2.1.mhd	1
554961.20171230.2.1.mhd	4
554964.20180103.2.1.mhd	1
555103.20180104.2.1.mhd	2
555144.20180106.2.1.mhd	4
555156.20180106.2.1.mhd	4
555204.20180107.2.1.mhd	1
555205.20180106.2.1.mhd	1
555208.20180107.2.1.mhd	6
555298.20180104.2.1.mhd	4
555361.20180104.2.1.mhd	6
555447.20171231.2.1.mhd	4
555451.20180108.2.1.mhd	6
555501.20180107.2.1.mhd	4
555576.20180110.2.1.mhd	2
555833.20180111.2.1.mhd	1
556061.20180114.2.1.mhd	1
556184.20180116.2.1.mhd	4
556206.20180123.2.1.mhd	4
556339.20180116.2.1.mhd	1
556375.20180118.2.1.mhd	1
556432.20180114.2.1.mhd	4
556445.20180116.2.1.mhd	1
556562.20180118.2.1.mhd	1
556634.20180118.2.1.mhd	2
556645.20180119.2.1.mhd	4
556662.20180120.2.1.mhd	4
556671.20180120.2.1.mhd	1
556743.20180123.2.1.mhd	1
556788.20180119.2.1.mhd	1
556802.20180121.2.1.mhd	1
556837.20180117.2.1.mhd	1
556886.20180121.2.1.mhd	4
556950.20180123.2.1.mhd	4
556957.20180120.2.1.mhd	6
557009.20180123.2.1.mhd	1
557012.20180120.2.1.mhd	4
557135.20180124.2.1.mhd	4
557187.20180125.2.1.mhd	6
557293.20180126.2.1.mhd	4
557301.20180127.2.1.mhd	1
557303.20180126.2.1.mhd	1
557313.20180127.2.1.mhd	2
557316.20180127.2.1.mhd	1
557389.20180121.2.1.mhd	4
557402.20180128.2.1.mhd	1
557423.20180126.2.1.mhd	1
557432.20180124.3.1.mhd	4
557494.20180128.2.1.mhd	1
557634.20180130.2.1.mhd	4
557635.20180131.2.1.mhd	6
557737.20180131.2.1.mhd	4
557859.20180131.2.1.mhd	4
557868.20180202.2.1.mhd	1
557912.20180202.2.1.mhd	1
557920.20180202.2.1.mhd	1
557924.20180202.2.1.mhd	1
557925.20180203.2.1.mhd	1
557931.20180204.2.1.mhd	1
557996.20180205.2.1.mhd	4
558018.20180205.2.1.mhd	1
558146.20180205.2.1.mhd	4
558161.20180205.2.1.mhd	1
558198.20180206.2.1.mhd	4
558217.20180206.2.1.mhd	4
558282.20180206.2.1.mhd	4
558441.20180209.2.1.mhd	1
558538.20180214.2.1.mhd	6
558603.20180212.2.1.mhd	4
558604.20180213.2.1.mhd	4
558641.20180207.2.1.mhd	4
558647.20180212.2.1.mhd	1
558649.20180213.2.1.mhd	1
558650.20180213.2.1.mhd	1
558655.20180213.2.1.mhd	4
558660.20180211.2.1.mhd	1
558680.20180213.2.1.mhd	4
558681.20180214.2.1.mhd	1
558695.20180215.2.1.mhd	2
558697.20180211.2.1.mhd	2
558703.20180215.2.1.mhd	4
558705.20180215.2.1.mhd	1
558708.20180204.2.1.mhd	6
558726.20180203.2.1.mhd	1
558732.20180216.2.1.mhd	1
558744.20180218.2.1.mhd	1
558745.20180216.2.1.mhd	4
558760.20180218.2.1.mhd	1
558848.20180220.2.1.mhd	1
558850.20180221.2.1.mhd	1
558854.20180220.2.1.mhd	4
558999.20180220.2.1.mhd	1
559038.20180221.2.1.mhd	1
559183.20180221.2.1.mhd	4
559184.20180222.2.1.mhd	1
559188.20180217.2.1.mhd	3
559198.20180221.2.1.mhd	4
559219.20180221.2.1.mhd	1
559295.20180223.2.1.mhd	4
559454.20180225.2.1.mhd	6
559482.20180221.2.1.mhd	6
559491.20180219.2.1.mhd	2
559504.20180211.2.1.mhd	2
559573.20180224.2.1.mhd	2
559577.20180227.2.1.mhd	1
559622.20180227.3.1.mhd	1
559682.20180222.2.1.mhd	4
559711.20180225.2.1.mhd	4
559747.20180227.2.1.mhd	2
559800.20180301.2.1.mhd	1
559802.20180228.2.1.mhd	4
559899.20180215.2.1.mhd	1
559904.20180301.2.1.mhd	1
559915.20180301.2.1.mhd	1
559936.20180302.2.1.mhd	4
559981.20180303.2.1.mhd	1
560164.20180304.2.1.mhd	1
560165.20180304.2.1.mhd	1
560267.20180305.2.1.mhd	1
560379.20180306.2.1.mhd	1
560457.20171225.2.1.mhd	6
560501.20180308.2.1.mhd	1
560504.20180308.2.1.mhd	3
560538.20180307.2.1.mhd	4
560709.20180310.2.1.mhd	1
560832.20180315.2.1.mhd	1
560931.20180310.2.1.mhd	4
560937.20180311.3.1.mhd	4
561210.20180329.2.1.mhd	4
561297.20180315.2.1.mhd	1
561418.20180317.2.1.mhd	1
561438.20180317.2.1.mhd	6
561442.20180317.2.1.mhd	4
561537.20180316.3.1.mhd	1
561539.20180318.2.1.mhd	1
561787.20180320.2.1.mhd	1
562009.20180322.2.1.mhd	1
562277.20180326.2.1.mhd	4
562451.20180327.2.1.mhd	1
562462.20180328.2.1.mhd	1
562471.20180322.2.1.mhd	6
562475.20180323.2.1.mhd	4
562525.20180328.2.1.mhd	6
562577.20180329.2.1.mhd	1
562632.20180329.2.1.mhd	1
562663.20180329.2.1.mhd	1
562729.20180329.2.1.mhd	4
562731.20180331.2.1.mhd	4
562742.20180325.2.1.mhd	4
562761.20180331.2.1.mhd	4
562762.20180331.2.1.mhd	1
562826.20180401.2.1.mhd	1
562828.20180329.2.1.mhd	4
562880.20180411.2.1.mhd	2
562972.20180403.2.1.mhd	4
562980.20180329.2.1.mhd	6
563011.20180402.2.1.mhd	1
563023.20180401.2.1.mhd	6
563136.20180405.2.1.mhd	1
563153.20180406.2.1.mhd	1
563225.20180407.2.1.mhd	1
563244.20180406.2.1.mhd	2
563247.20180405.2.1.mhd	2
563310.20180408.2.1.mhd	1
563390.20180404.2.1.mhd	1
563406.20180406.2.1.mhd	4
563474.20180409.2.1.mhd	1
563531.20180410.2.1.mhd	1
563536.20180410.2.1.mhd	4
563842.20180413.2.1.mhd	4
563975.20180413.2.1.mhd	2
564004.20180410.2.1.mhd	1
564047.20180412.2.1.mhd	4
564060.20180416.2.1.mhd	1
564235.20180413.2.1.mhd	1
564361.20180412.2.1.mhd	6
564403.20180415.2.1.mhd	4
564482.20180419.2.1.mhd	1
564487.20180419.2.1.mhd	4
564510.20180410.2.1.mhd	6
564673.20180420.2.1.mhd	1
564678.20180422.2.1.mhd	1
564680.20180421.2.1.mhd	1
564762.20180421.2.1.mhd	1
564771.20180422.3.1.mhd	6
564975.20180424.2.1.mhd	1
565026.20180424.2.1.mhd	1
565038.20180418.2.1.mhd	2
565143.20180426.2.1.mhd	1
565149.20180422.2.1.mhd	4
565313.20180427.2.1.mhd	4
565398.20180427.2.1.mhd	5
565545.20180330.2.1.mhd	1
565672.20180428.2.1.mhd	4
864632.20130423.2.1.mhd	5
941350.20140520.2.1.mhd	5
943163.20140528.2.1.mhd	5
944442.20140607.2.1.mhd	3
954755.20140725.2.1.mhd	3
960112.20140823.2.1.mhd	5
998495.20150320.2.1.mhd	3
NCT177352.20180312.2.1.mhd	5
NCT65549.20160713.2.1.mhd	5
